# Supplementary material for: Pd-catalyzed intramolecular sequential Heck cyclization and oxidation reactions: a facile pathway for the synthesis of substituted cycloheptenone evaluated using computational studies
Source: Royal Society of Chemistry journal article supplement (doi:10.1039/c6nj02694j), 2016-11-10
Supplement: c6nj02694j2.pdf [file c6nj02694j2.pdf]

## Supporting Information

### **Pd-Catalyzed Intramolecular Sequential Heck Cyclization and Oxidation Reactions: A Facile Pathway for the Synthesis of Substituted Cycloheptenone with Computational Studies**

Jayanta K. Ray\*, Sunanda Paul, Paramita Ray, Raju Singha,  
Davuluri Yogeswara Rao, Surajit Nandi and Anakuthil Anoop\*

<sup>[a]</sup>*Department of Chemistry, Indian Institute of Technology, Kharagpur-721302, India*  
*Corresponding author: Tel.: +91 3222283326; fax: +91 3222282252.*

*E-mail address: [jkray@chem.iitkgp.ernet.in](mailto:jkray@chem.iitkgp.ernet.in)*

| <b>Table of Contents</b>                               | <b>Page Numbers</b> |
|--------------------------------------------------------|---------------------|
| <b>A. General Remarks</b>                              | <b>S2</b>           |
| <b>B. Spectra for compounds(4a-4h), 5a and (6a-6h)</b> | <b>S2-S18</b>       |
| <b>C. Computational section</b>                        | <b>S19-S25</b>      |

### **A. General remarks**

All reactions were carried out using oven-dried glassware. Commercial grade reagents were used without further purification. Solvents were dried and distilled following usual protocols prior to use. All yields refer to isolated yields after column purification. Column chromatography was carried out using Silica gel (60-120 mesh) purchased from Rankem, India. TLC was performed on aluminium-backed plates coated with Silica gel 60 with F254 indicator (Merck). The  $^1\text{H}$  NMR spectra were measured with Bruker-200 (200 MHz) or Bruker-400 (400 MHz) and  $^{13}\text{C}$  NMR spectra were measured with Bruker-200 (50 MHz) or Bruker-400 (100 MHz) using  $\text{CDCl}_3$ . Coupling constants in  $^1\text{H}$  NMR are in Hz. Elemental analyses were carried out in Perkin-Elmer 2400 instrument in the analytical lab of chemistry department, IIT, Kharagpur.

### **B. Spectra for the compounds 4a-m, 5a and 6a-m**

$^1\text{H}$  NMR of compound 4a

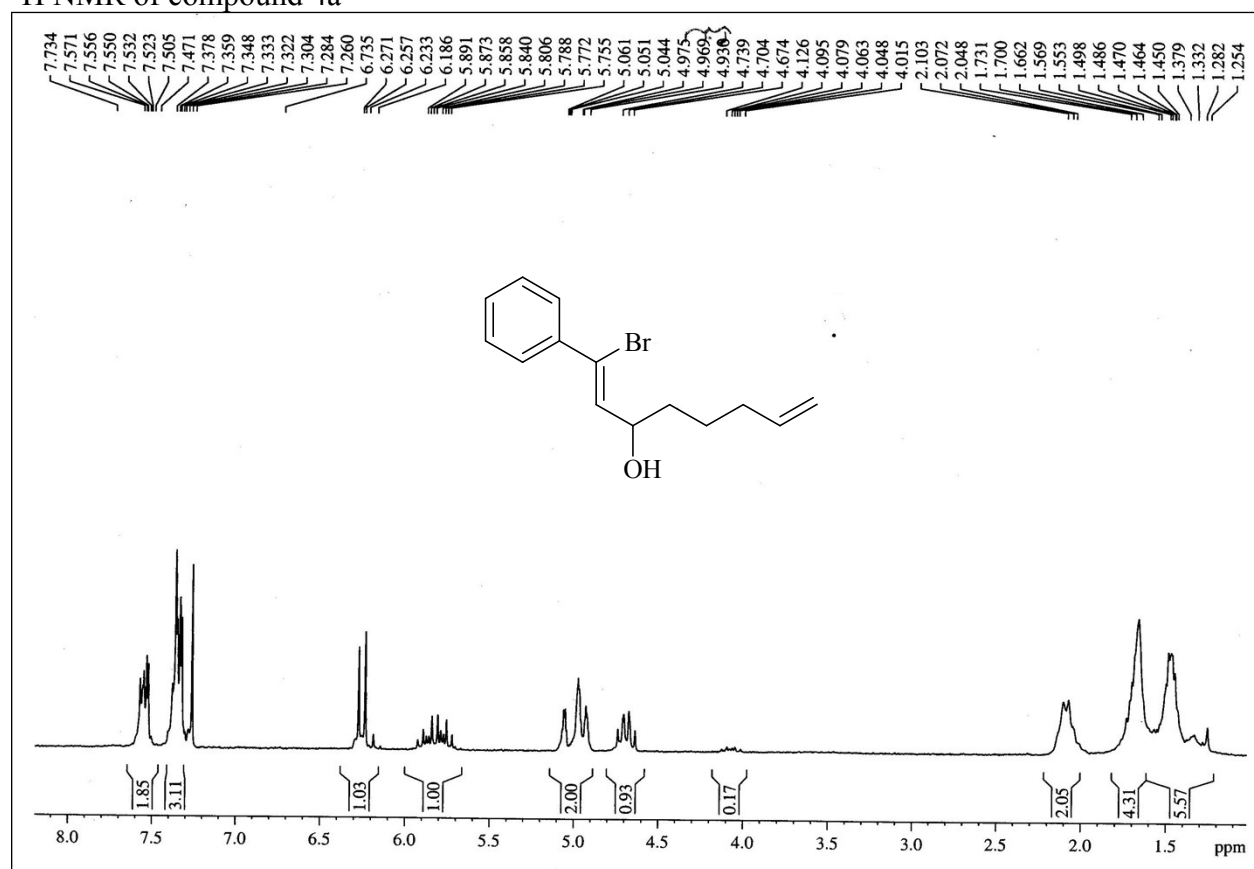

$^{13}\text{C}$  NMR of compound 4a

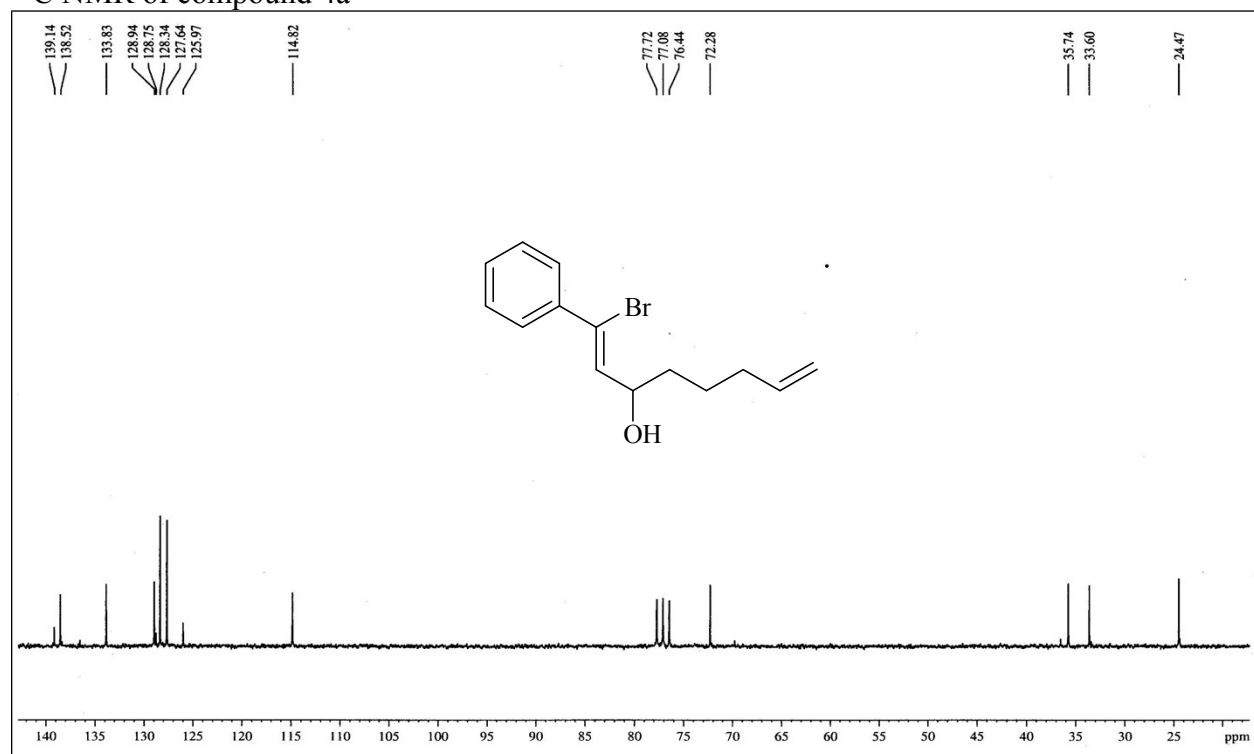

<sup>1</sup>H NMR of compound 4b

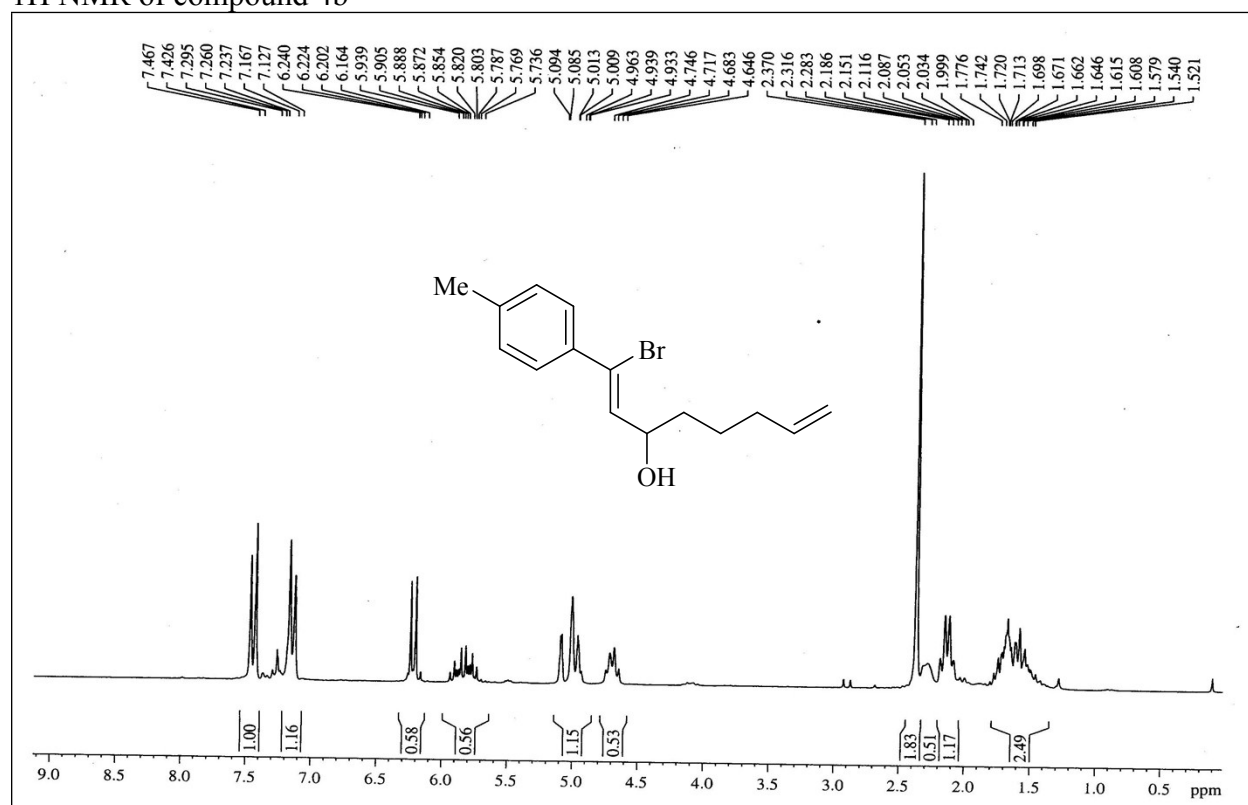

<sup>13</sup>C NMR of compound 4b

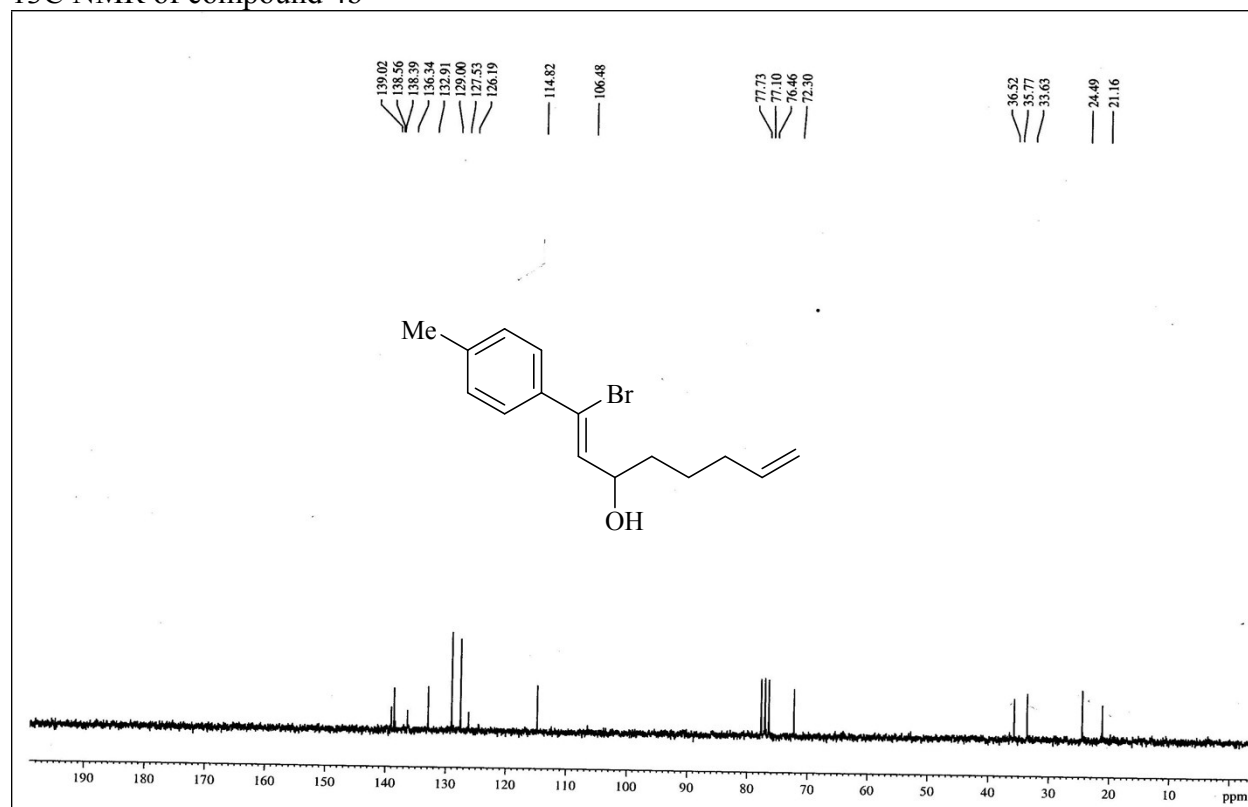

# <sup>1</sup>H NMR of compound 4c

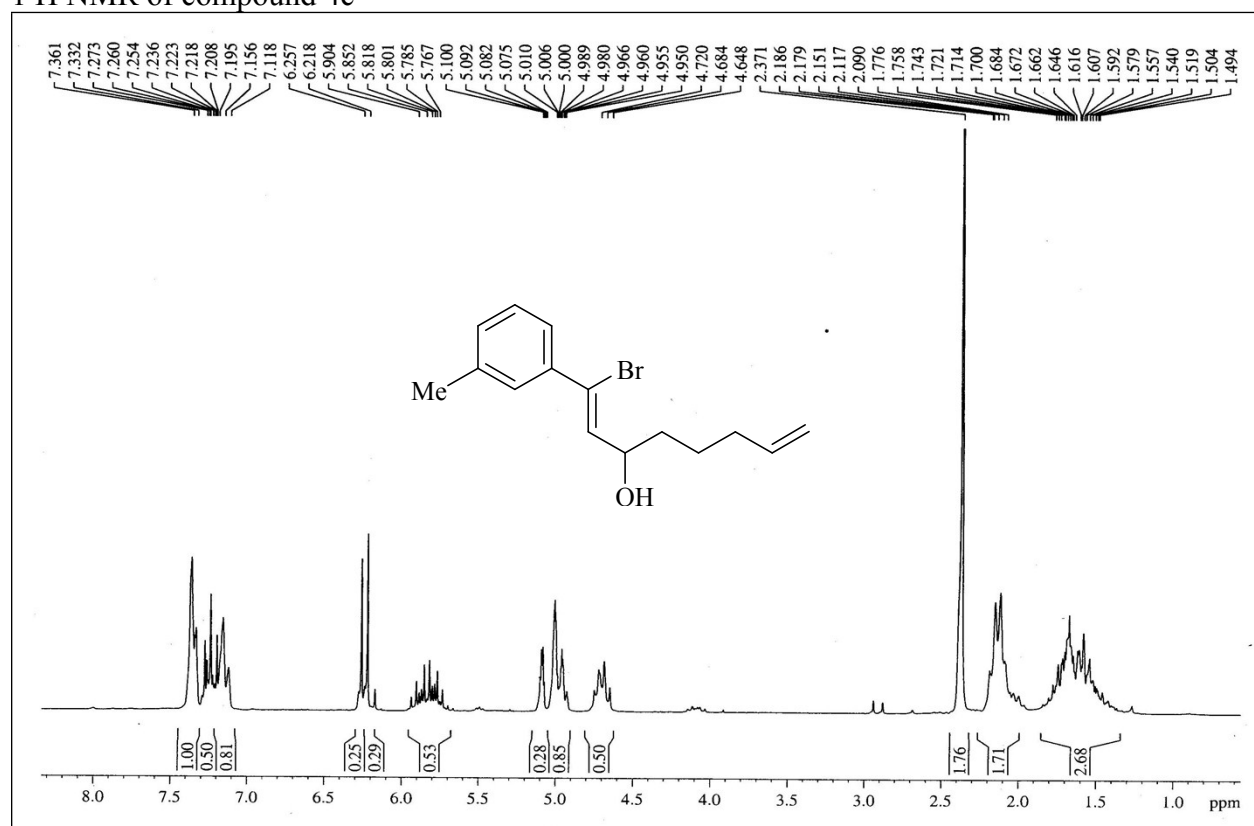

# <sup>13</sup>C NMR of compound 4c

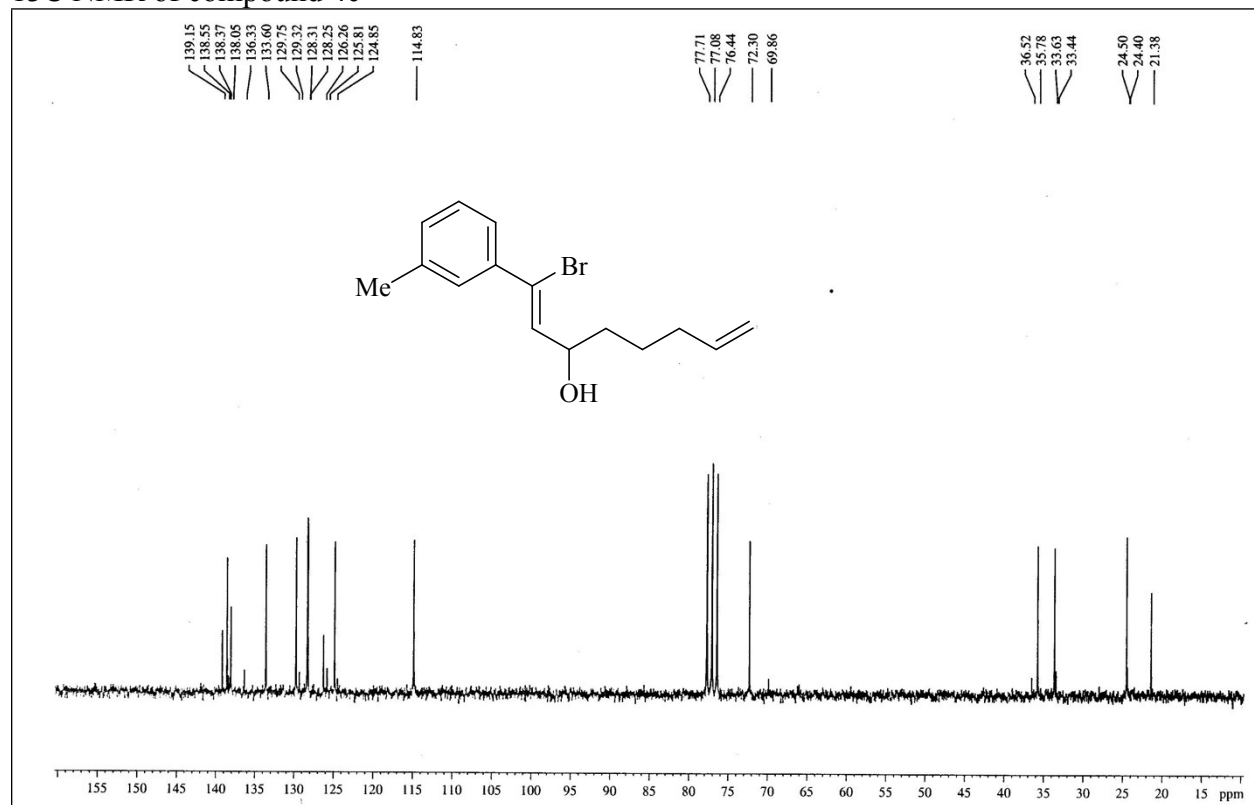

# <sup>1</sup>H NMR of compound 4d

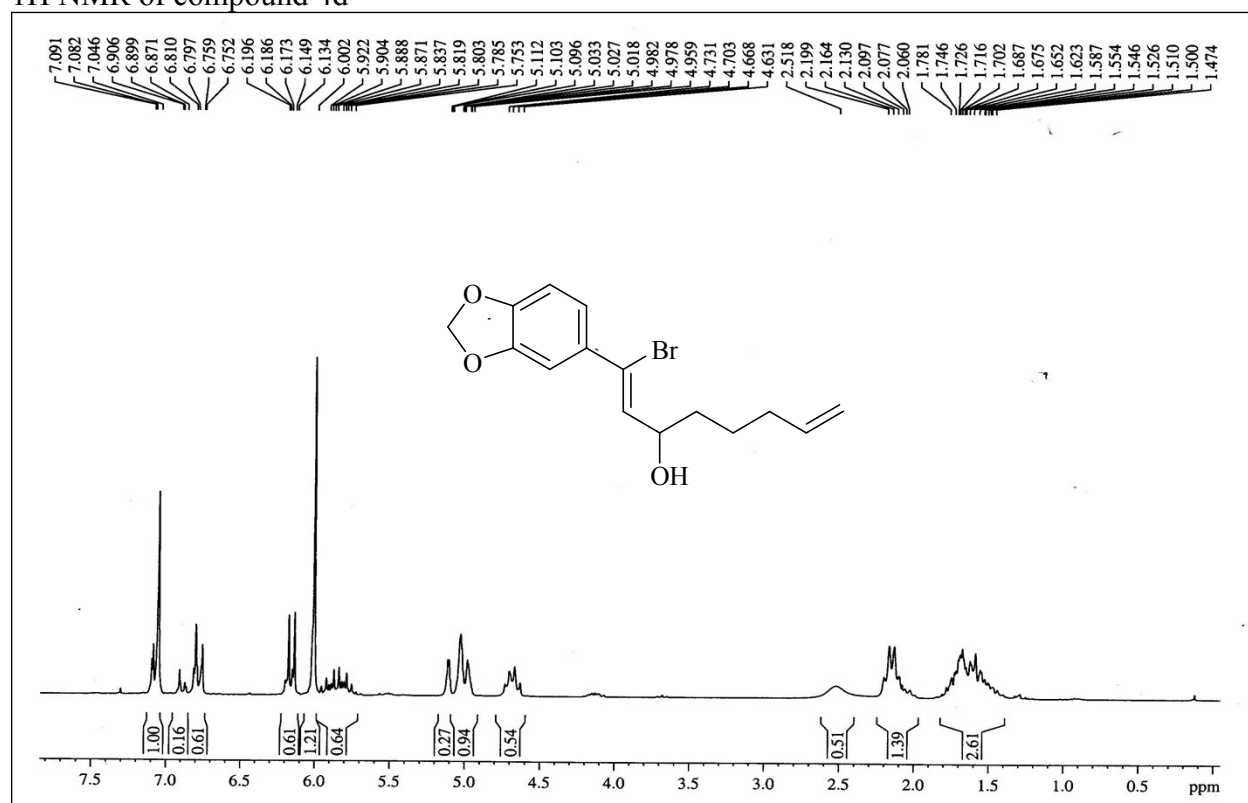

# <sup>13</sup>C NMR of compound 4d

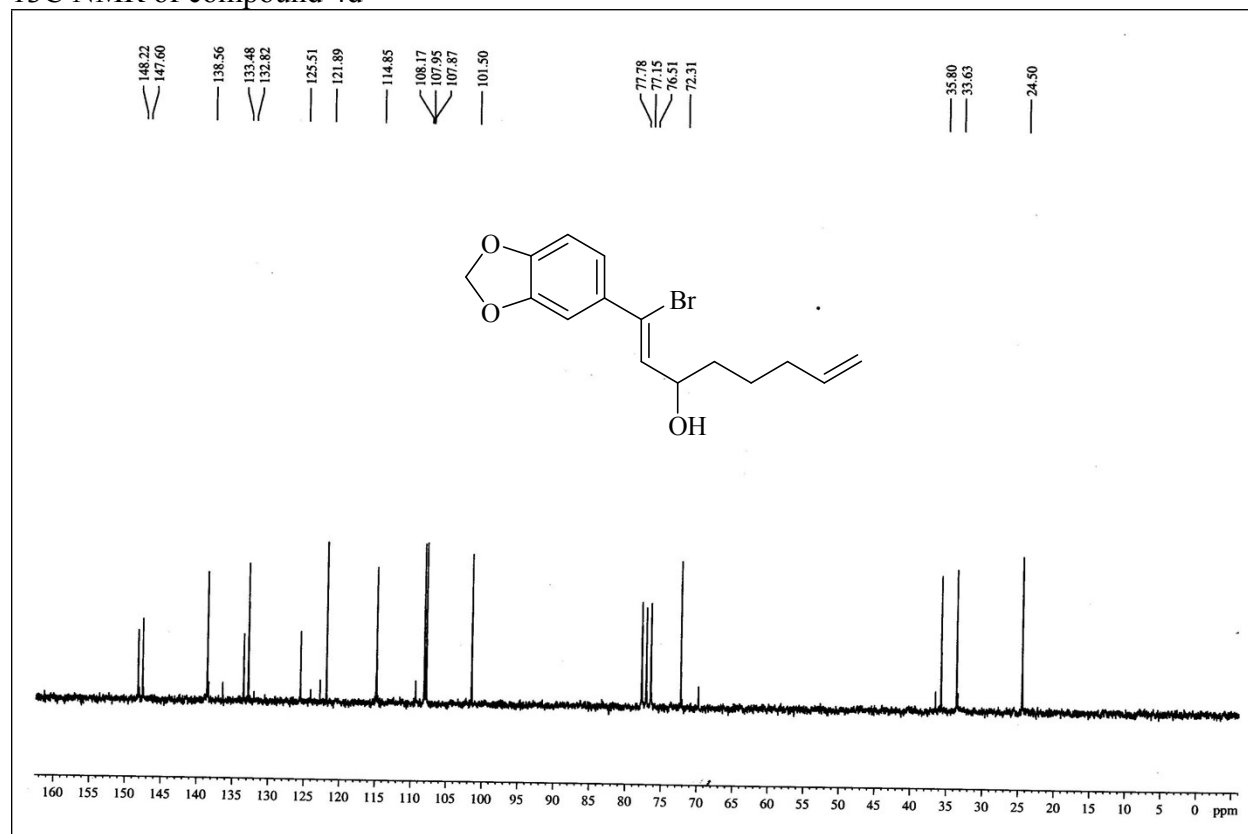

# <sup>1</sup>H NMR of compound 4e

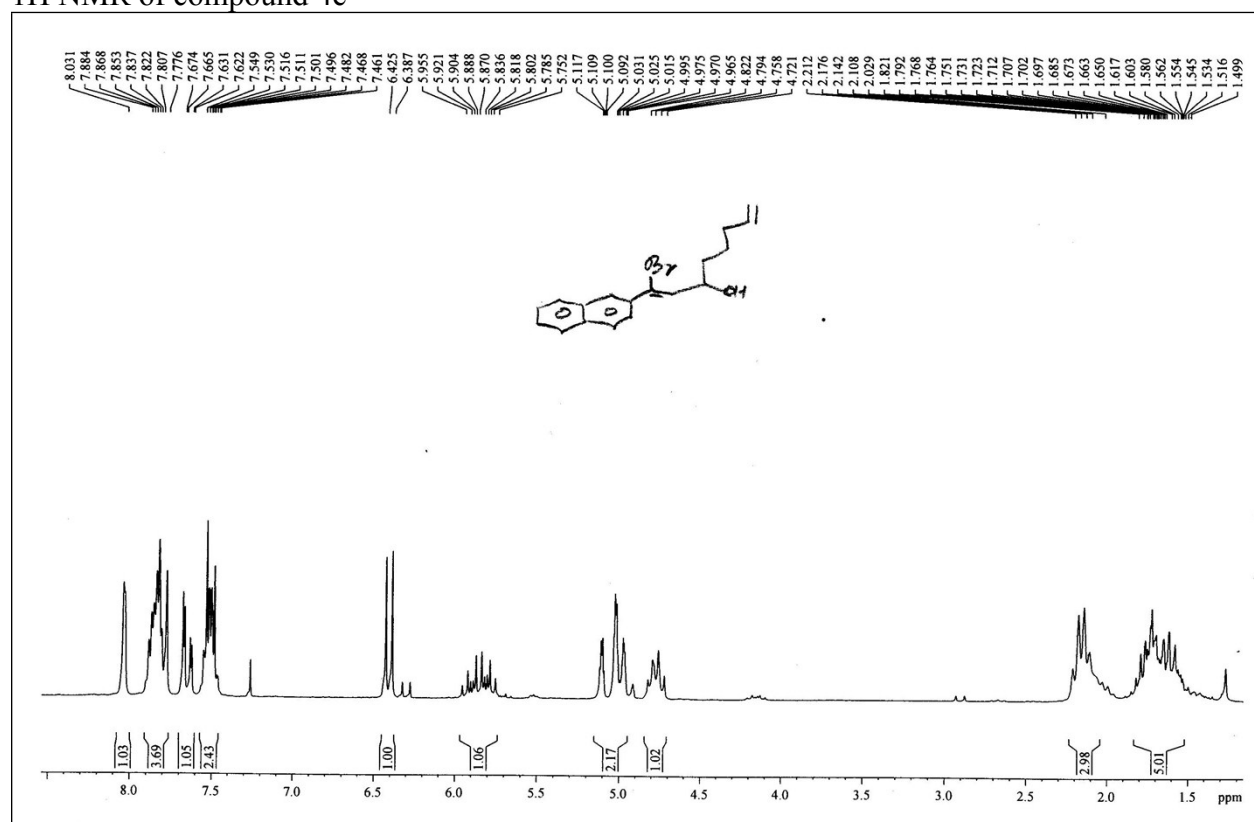

# <sup>13</sup>C NMR of compound 4e

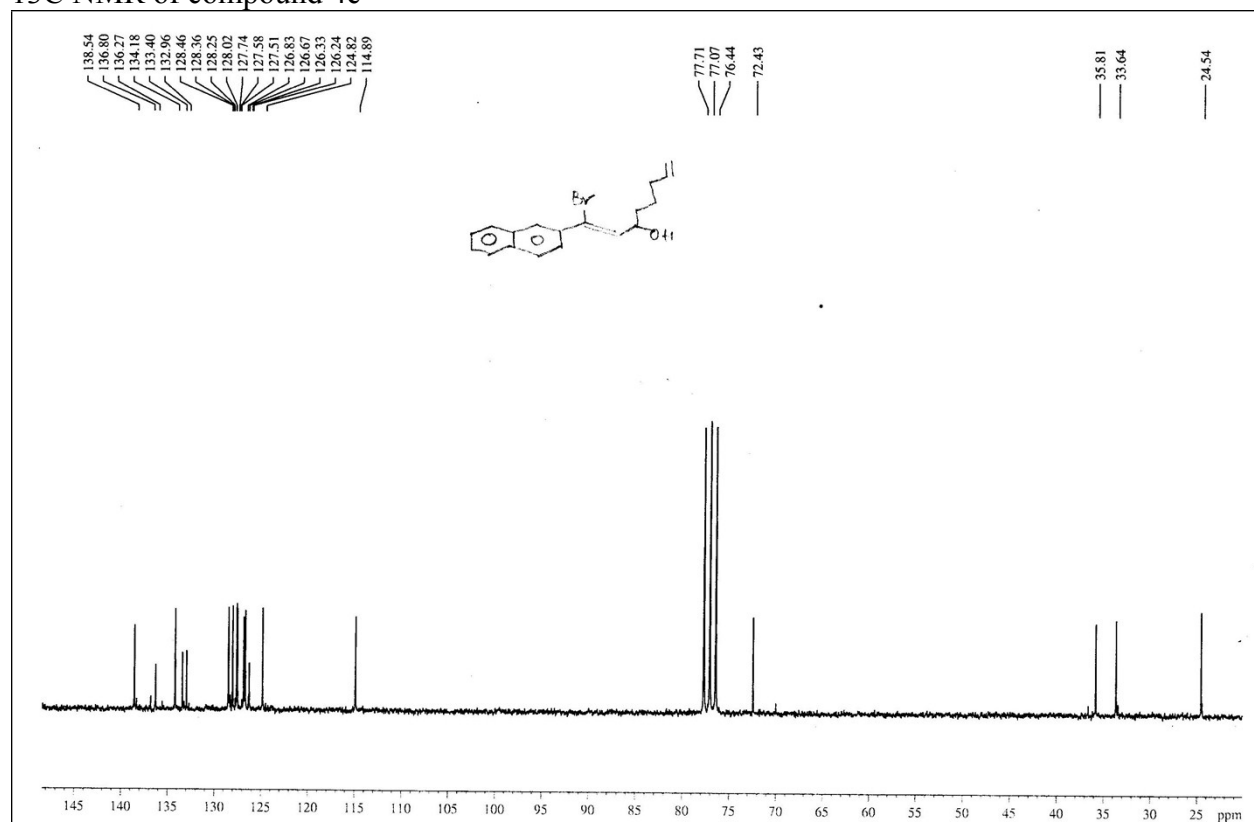

# <sup>1</sup>H NMR of compound 4f

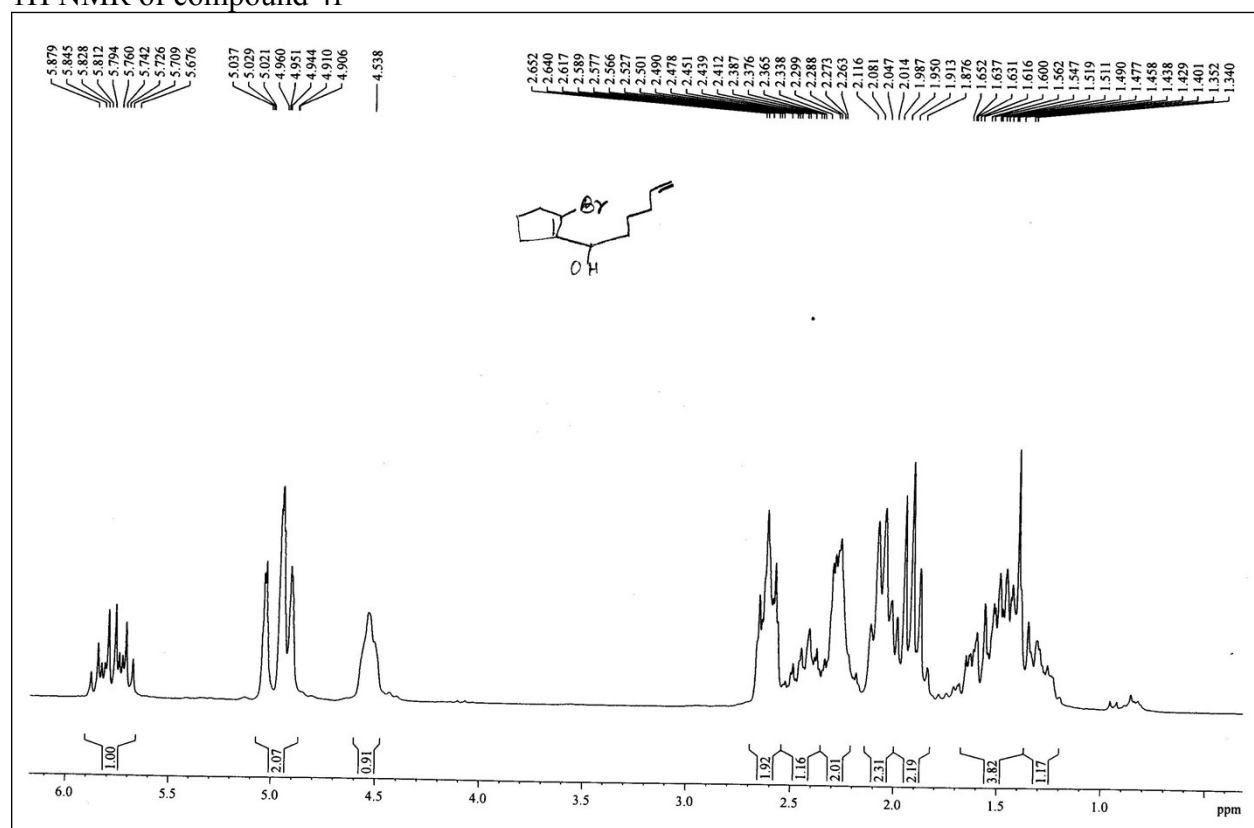

# <sup>13</sup>C NMR of compound 4f

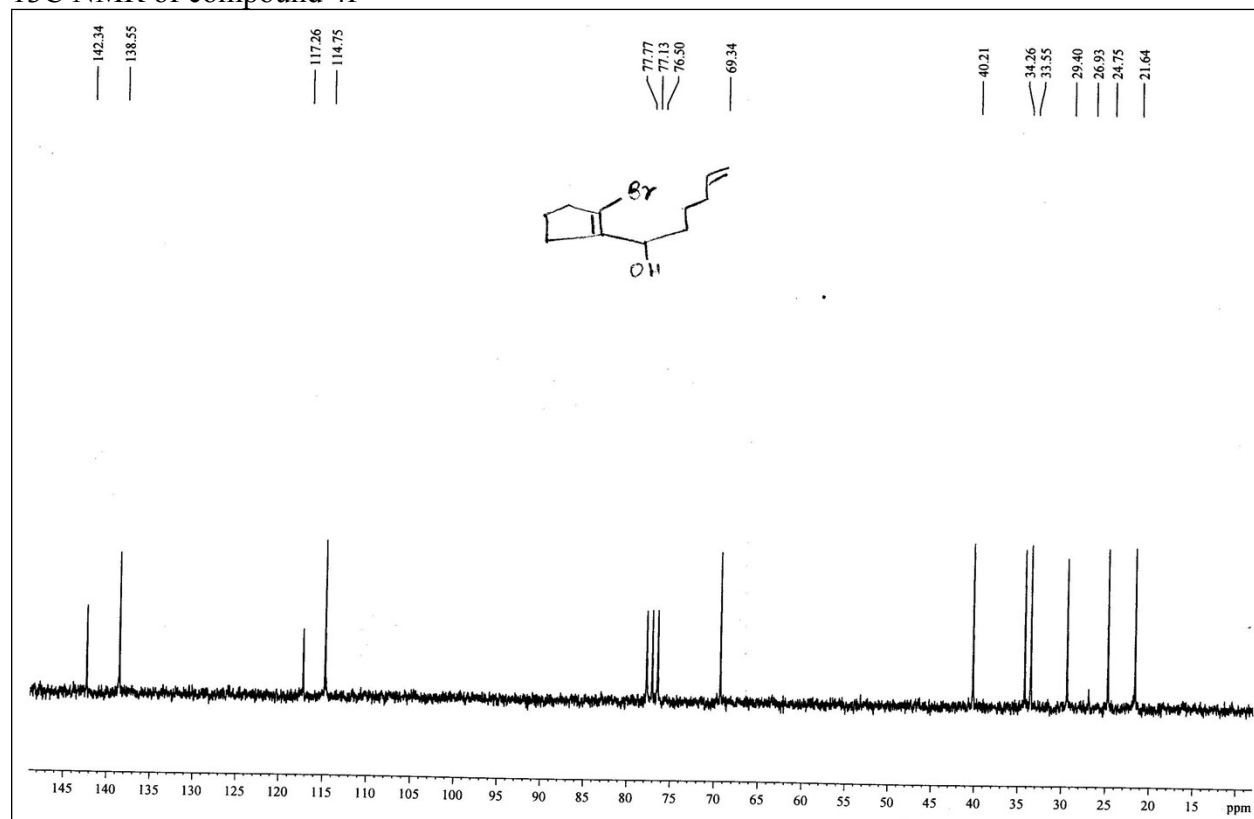



# <sup>1</sup>H NMR of compound 4g

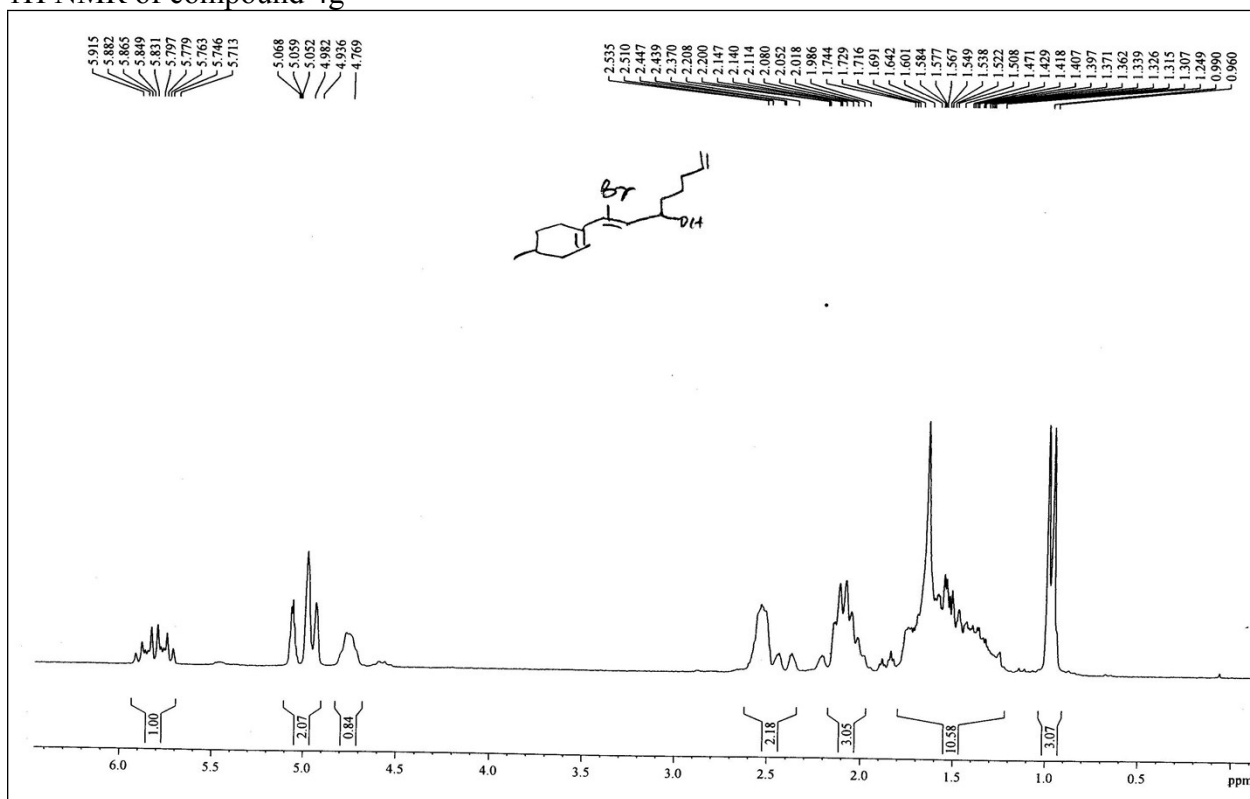

# <sup>13</sup>C NMR of compound 4g

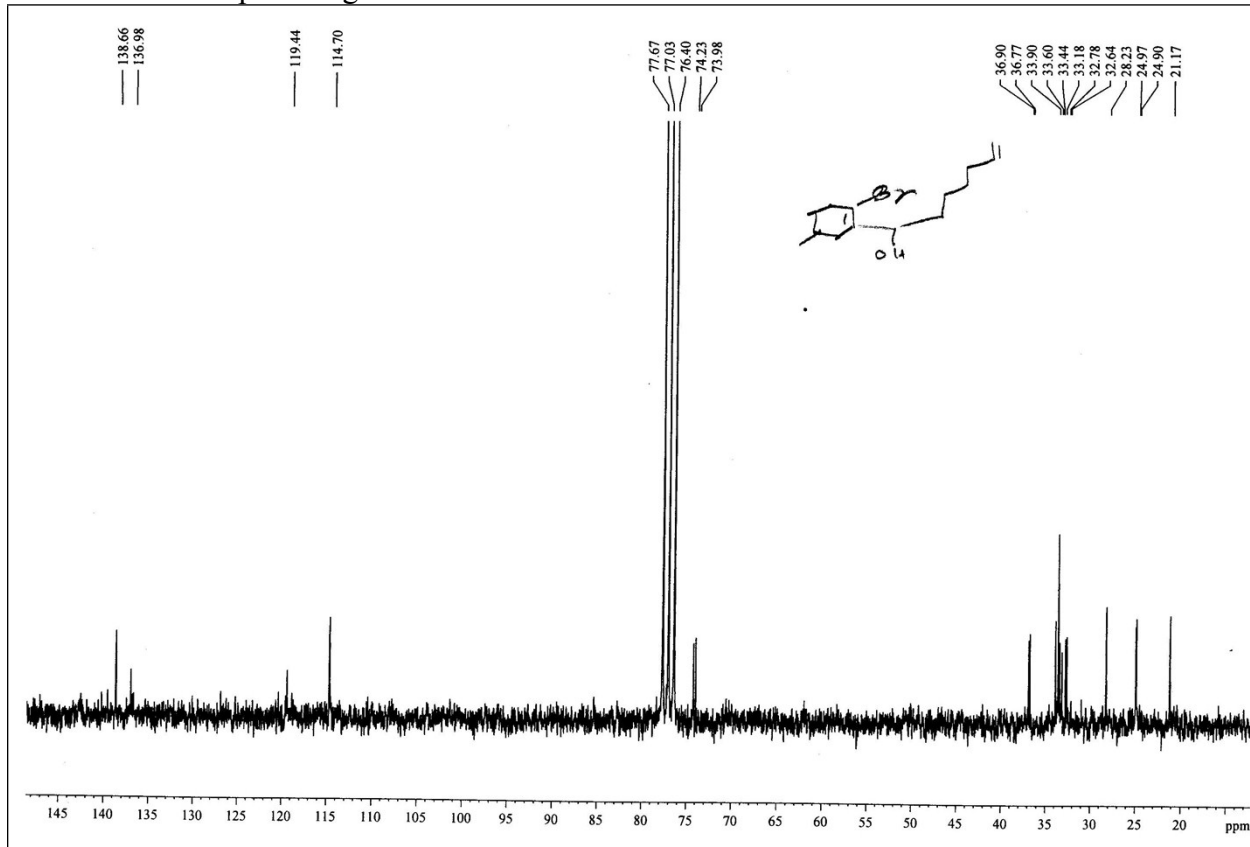

# <sup>1</sup>H NMR of compound 4h

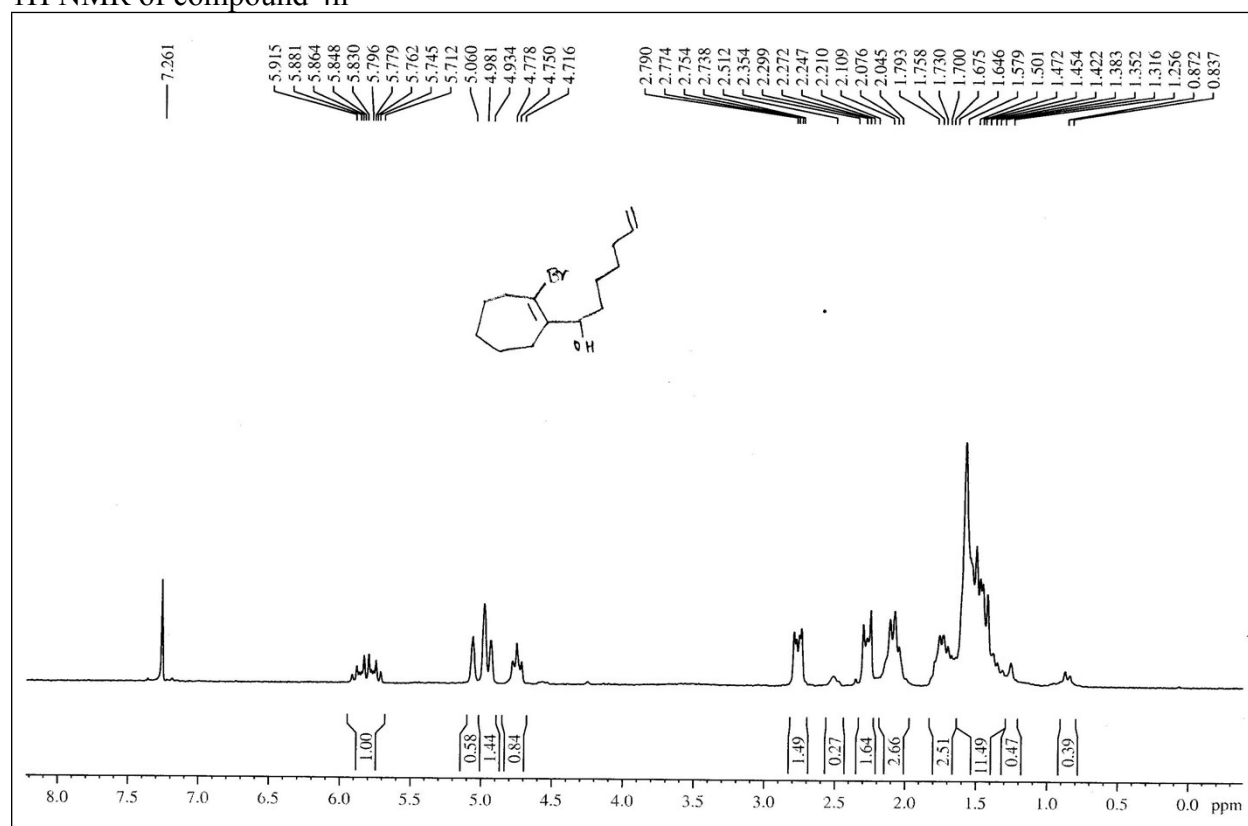

# <sup>13</sup>C NMR of compound 4h

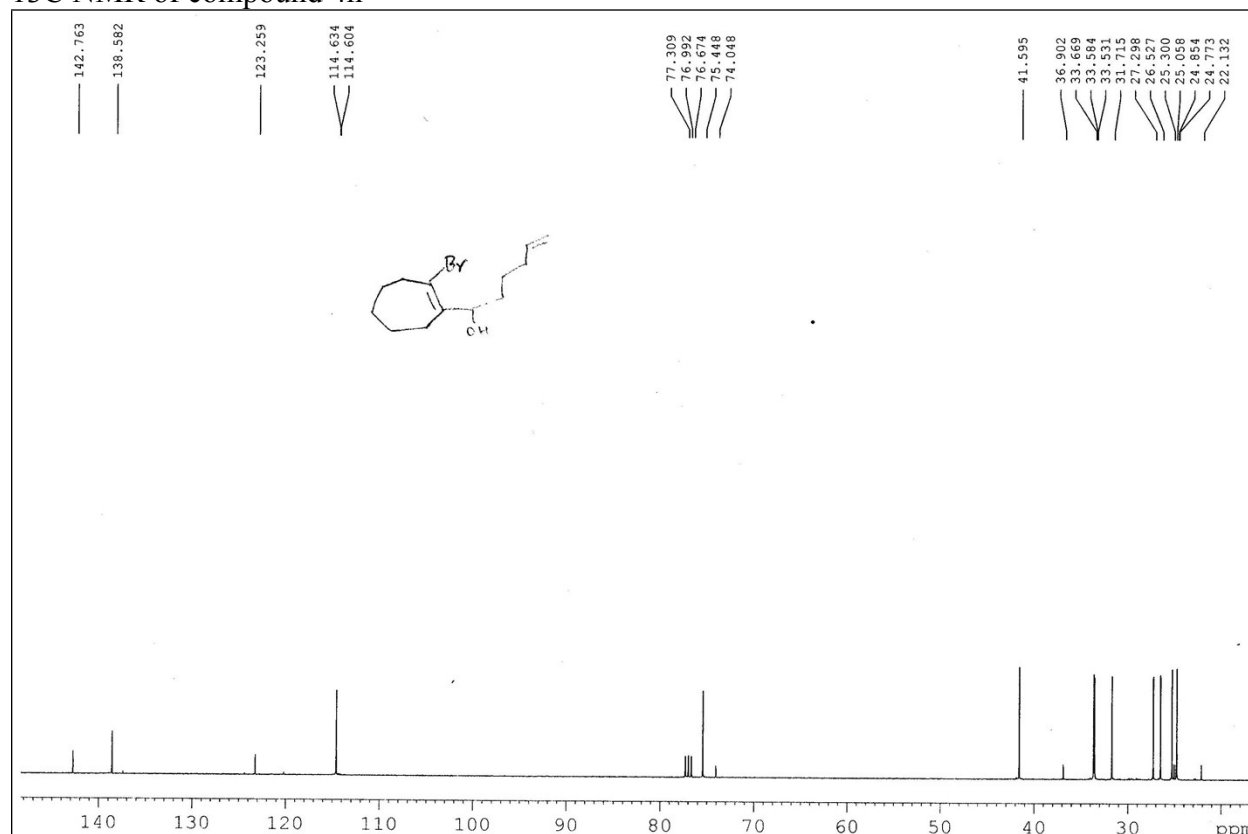

# <sup>1</sup>H NMR of compound 6a

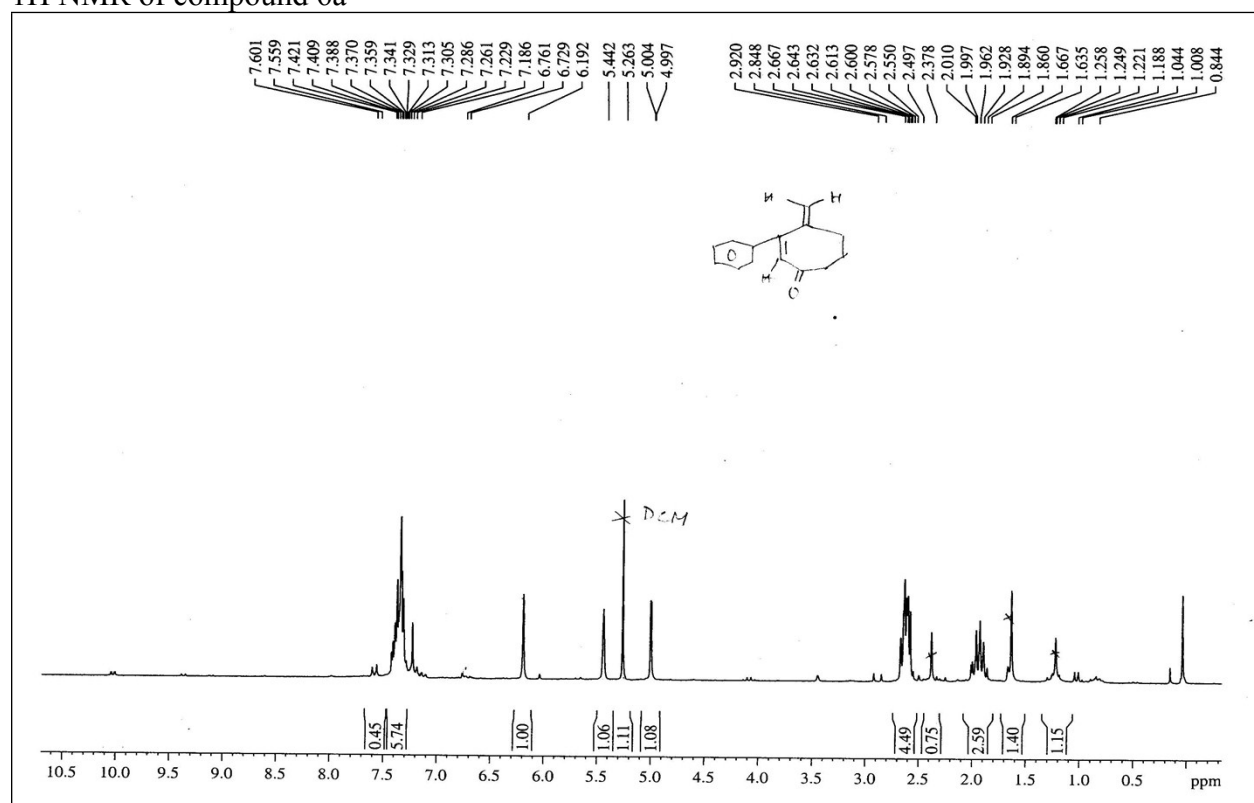

# <sup>13</sup>C NMR of compound 6a

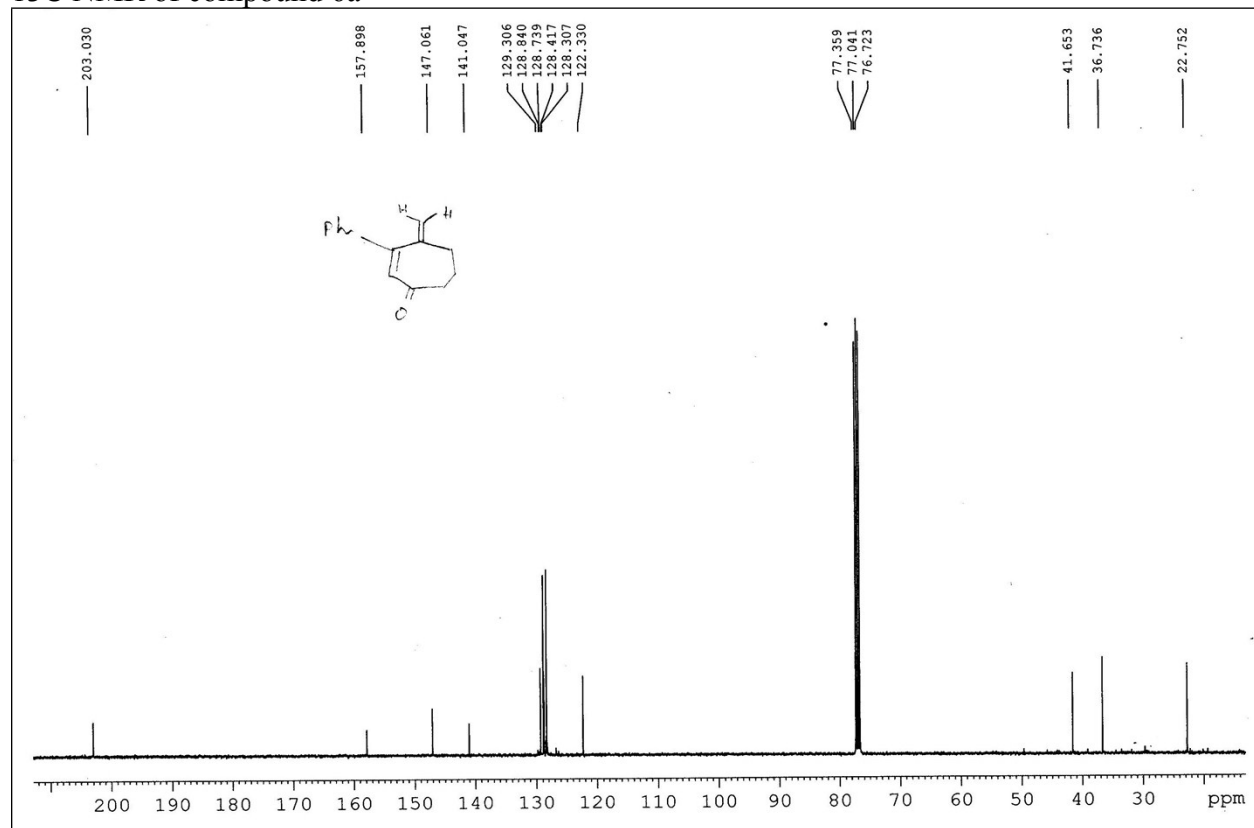

# <sup>1</sup>H NMR of compound 6b

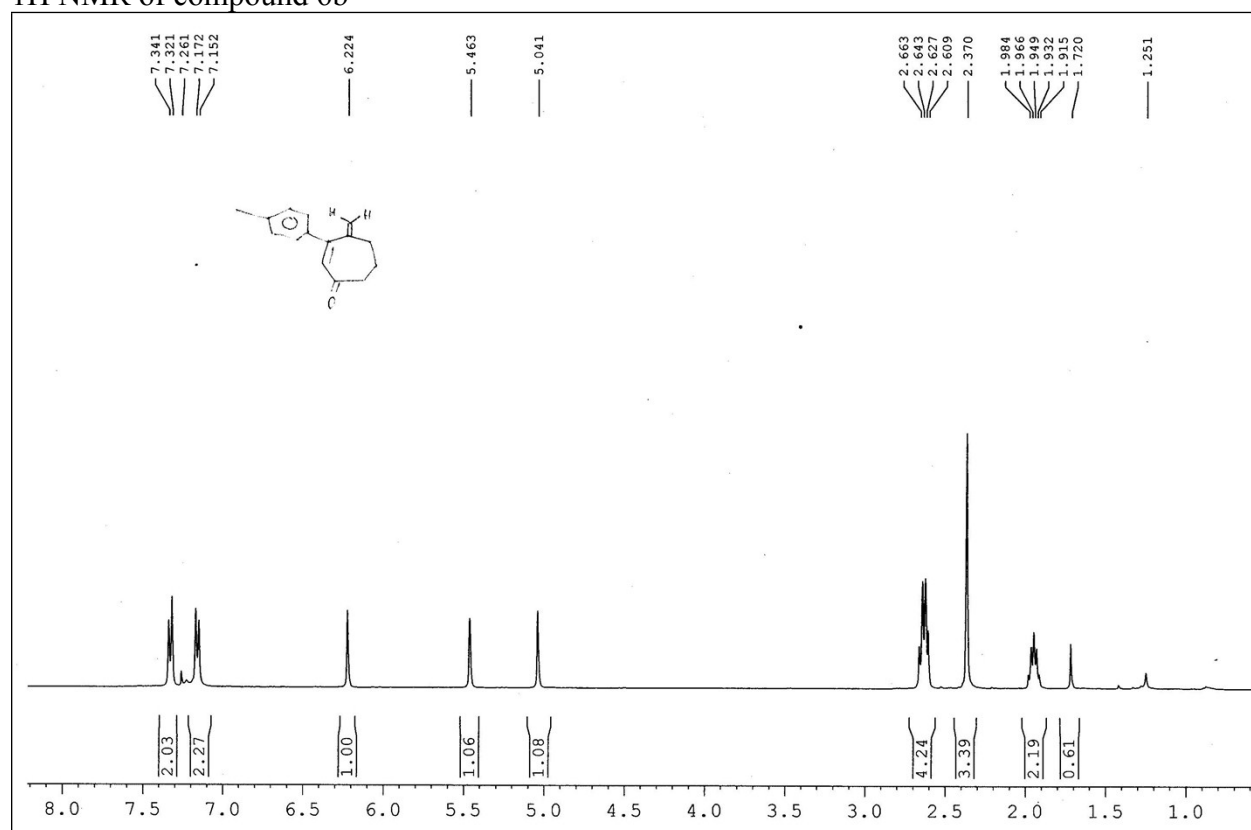

# <sup>13</sup>C NMR of compound 6b

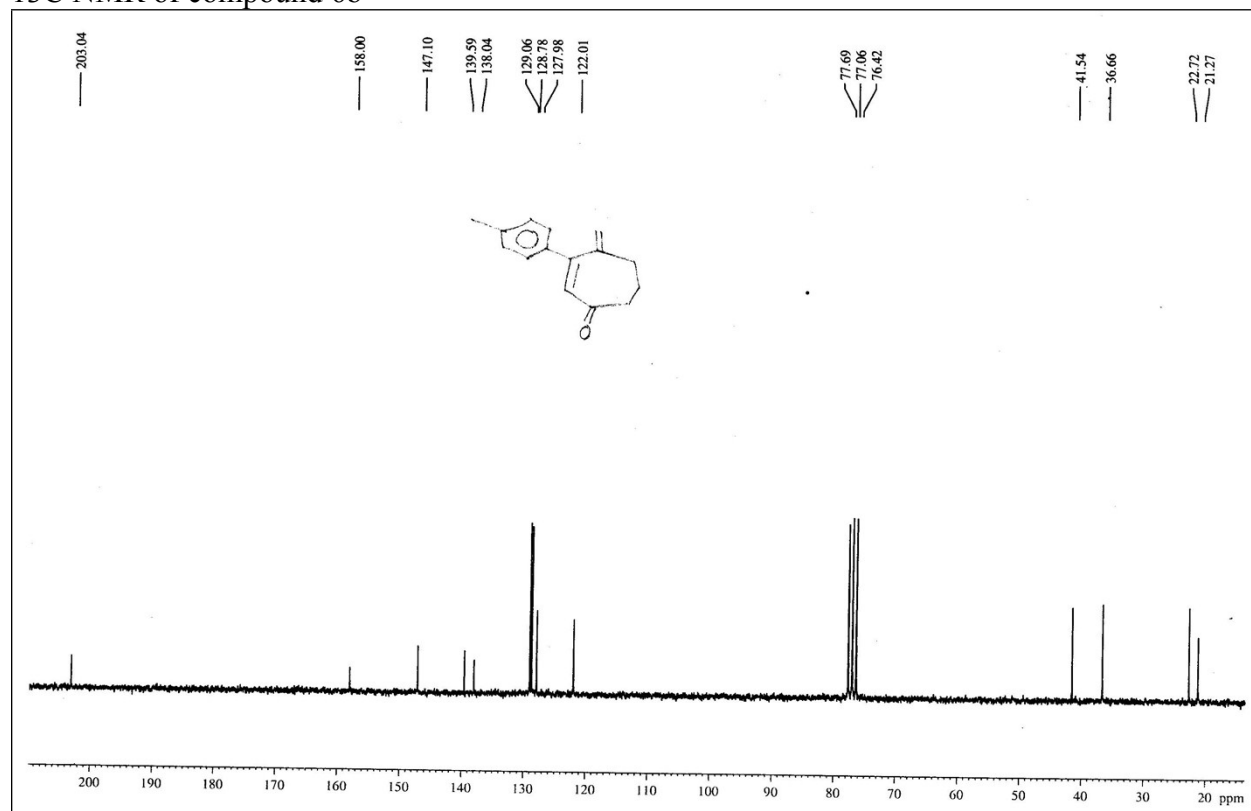

# <sup>1</sup>H NMR of compound 6c

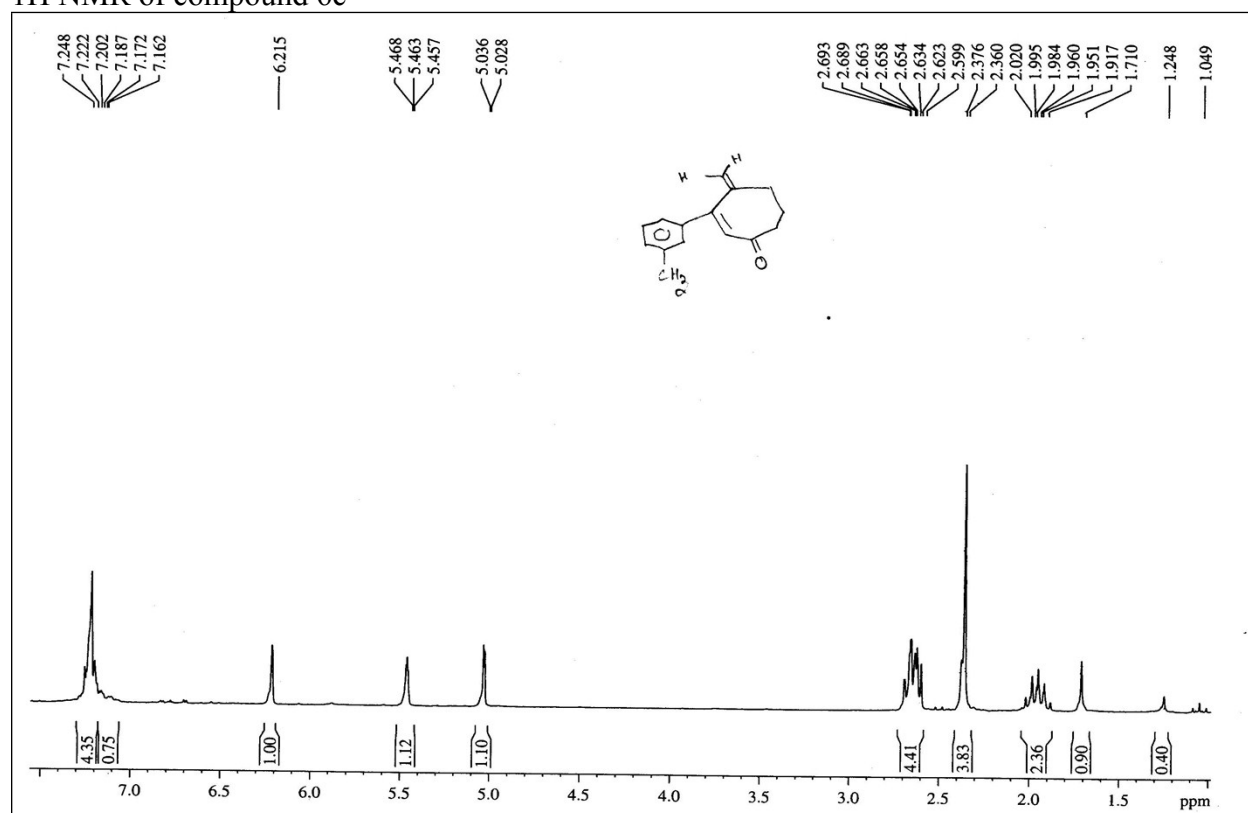

# <sup>13</sup>C NMR of compound 6c

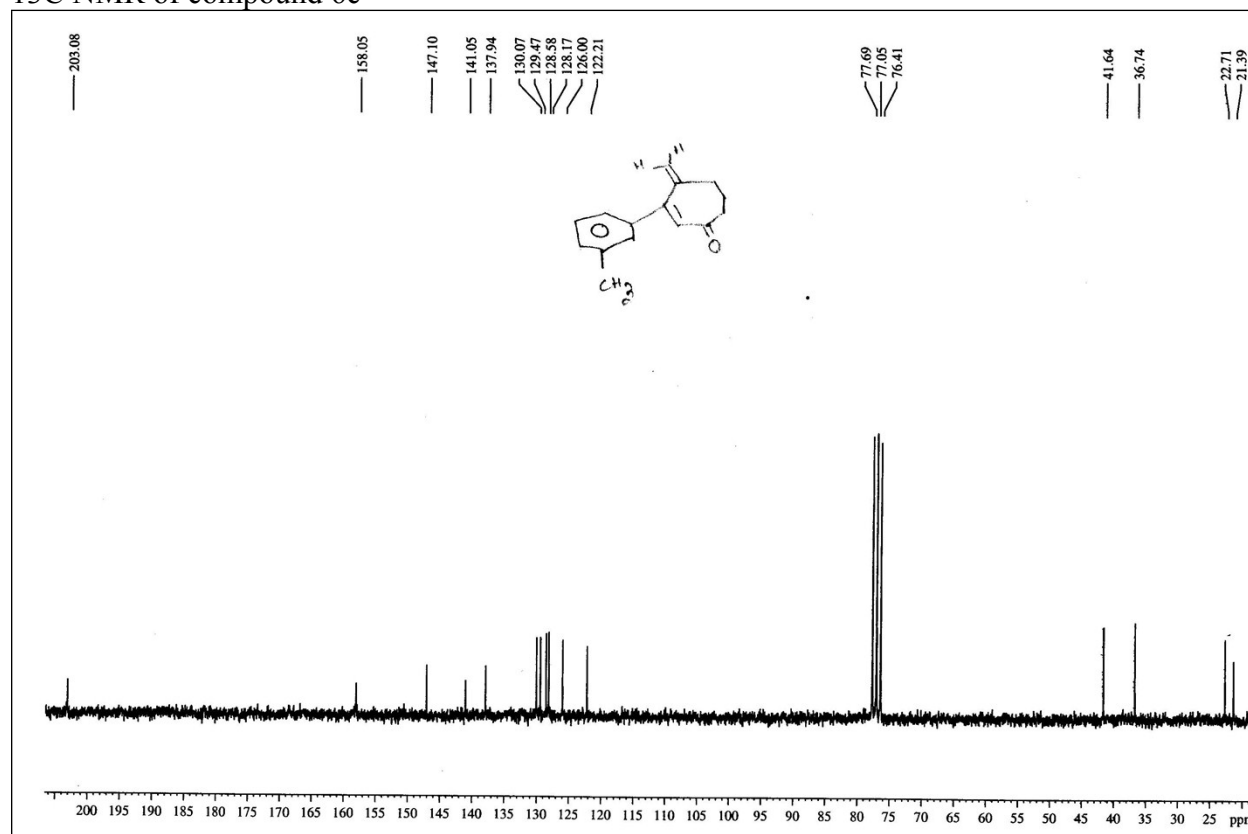

# <sup>1</sup>H NMR of compound 6d

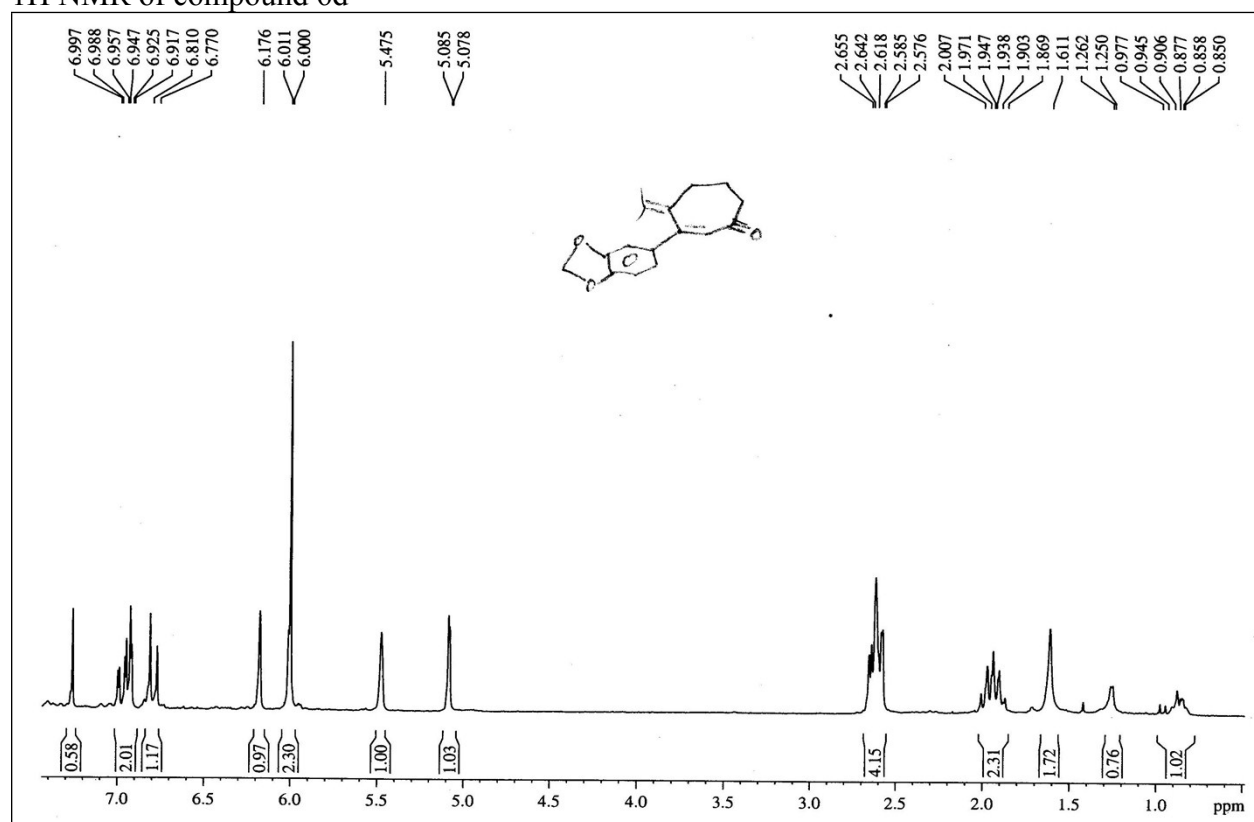

# <sup>13</sup>C NMR of compound 6d

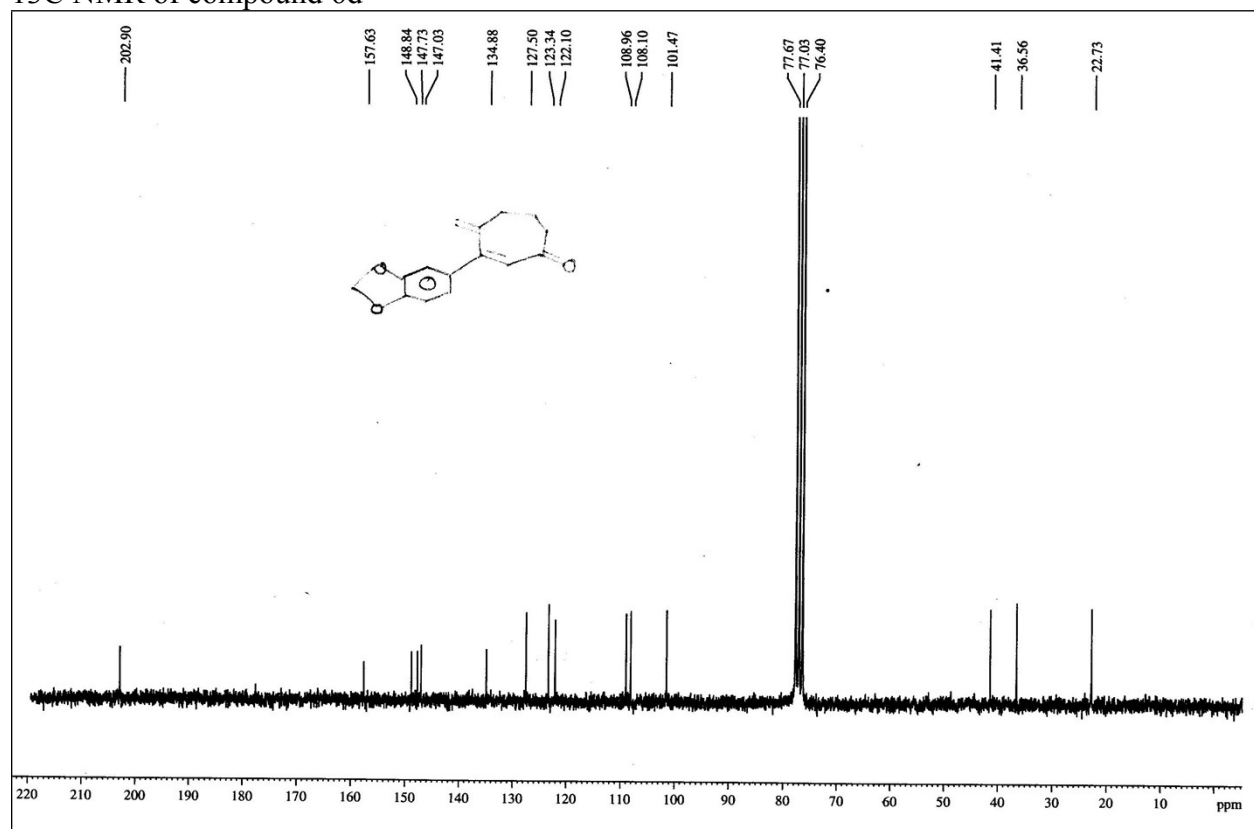

# <sup>1</sup>H NMR of compound 6e

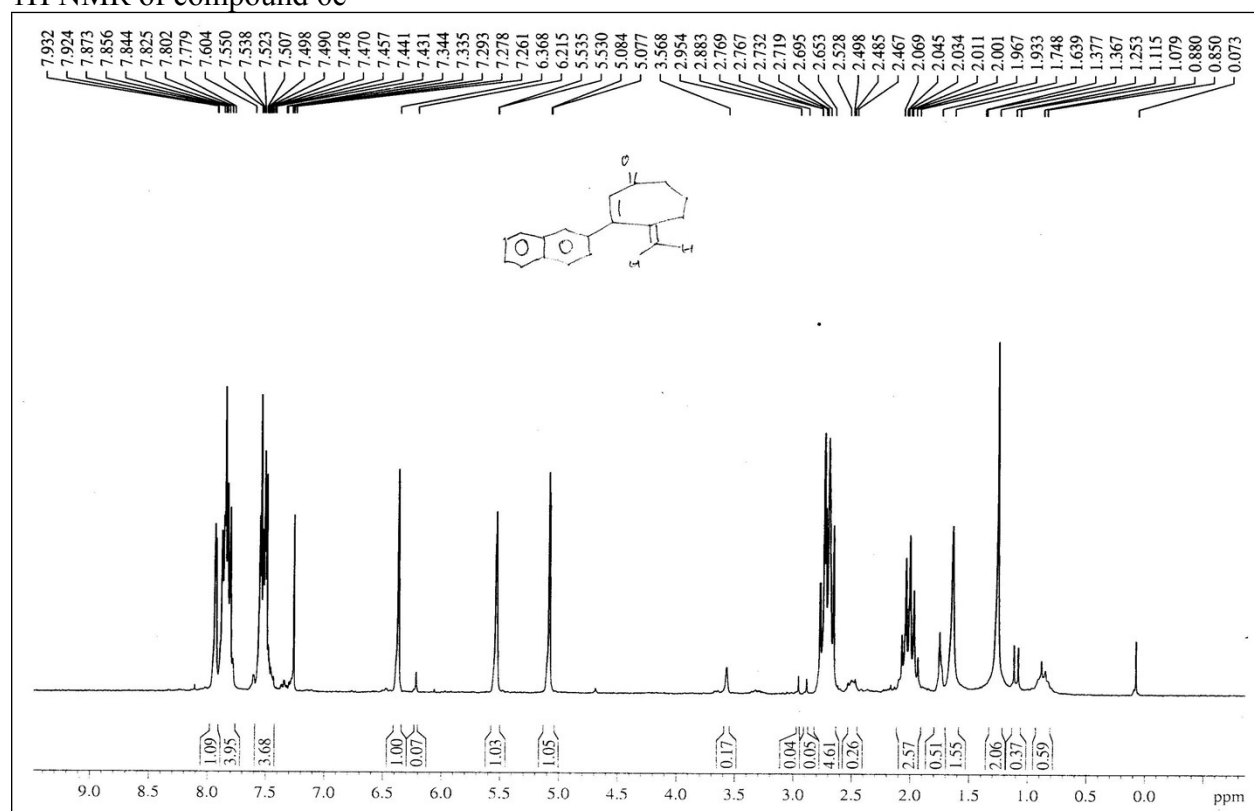

# <sup>13</sup>C NMR of compound 6e

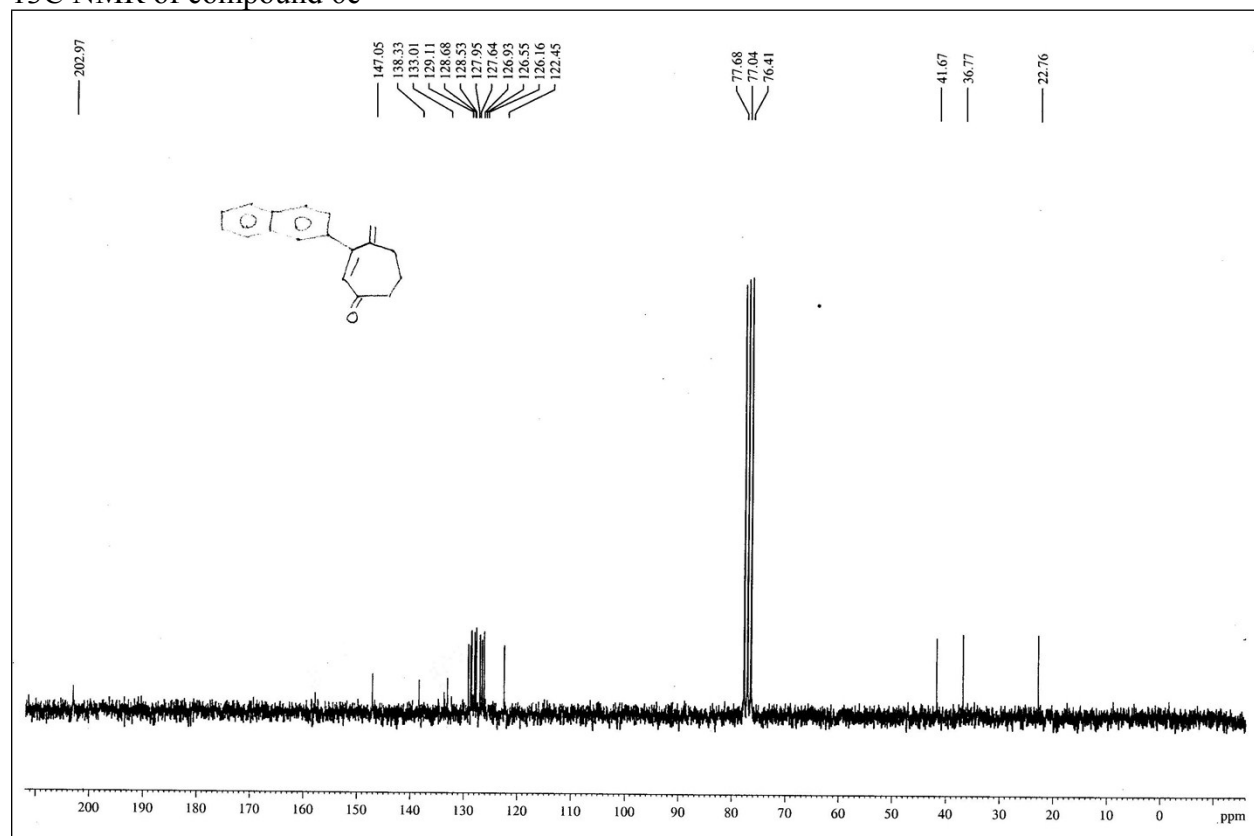

<sup>1</sup>H NMR of compound 6f

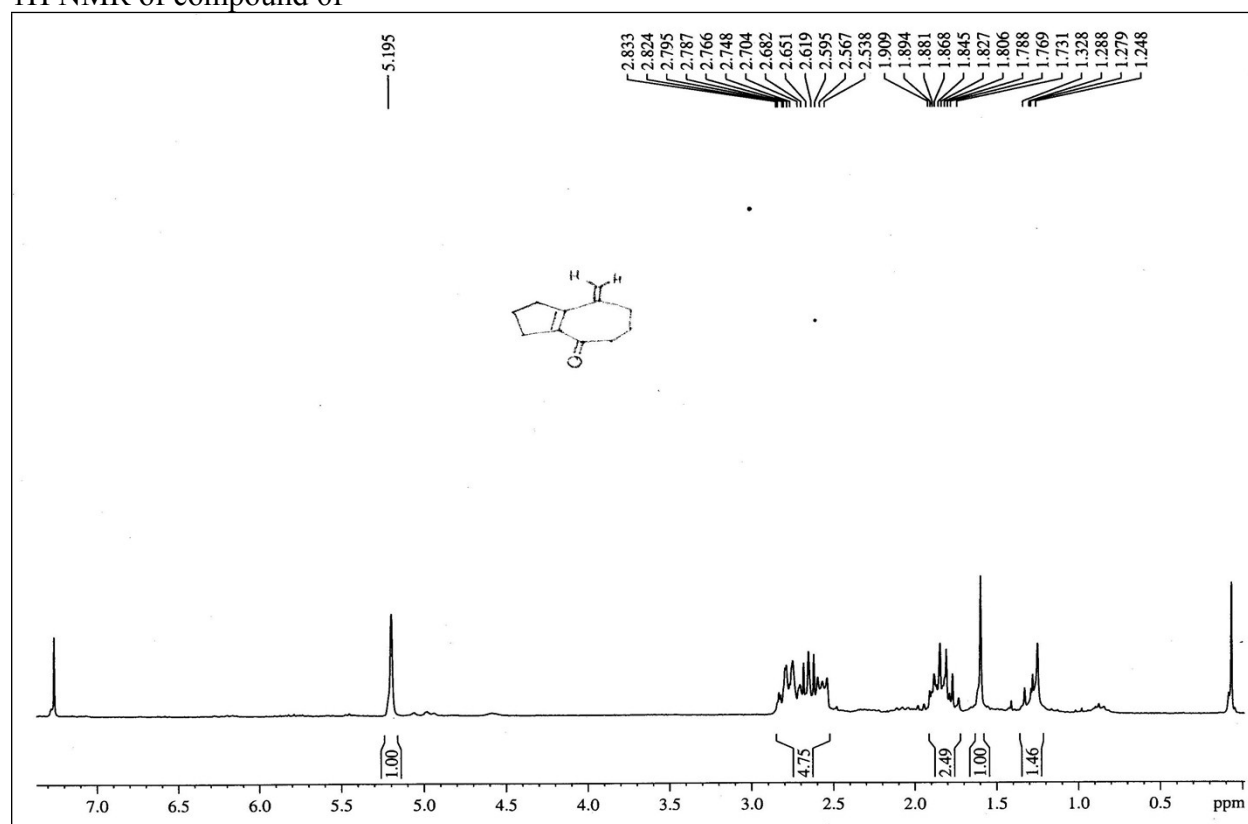

<sup>13</sup>C NMR of compound 6f

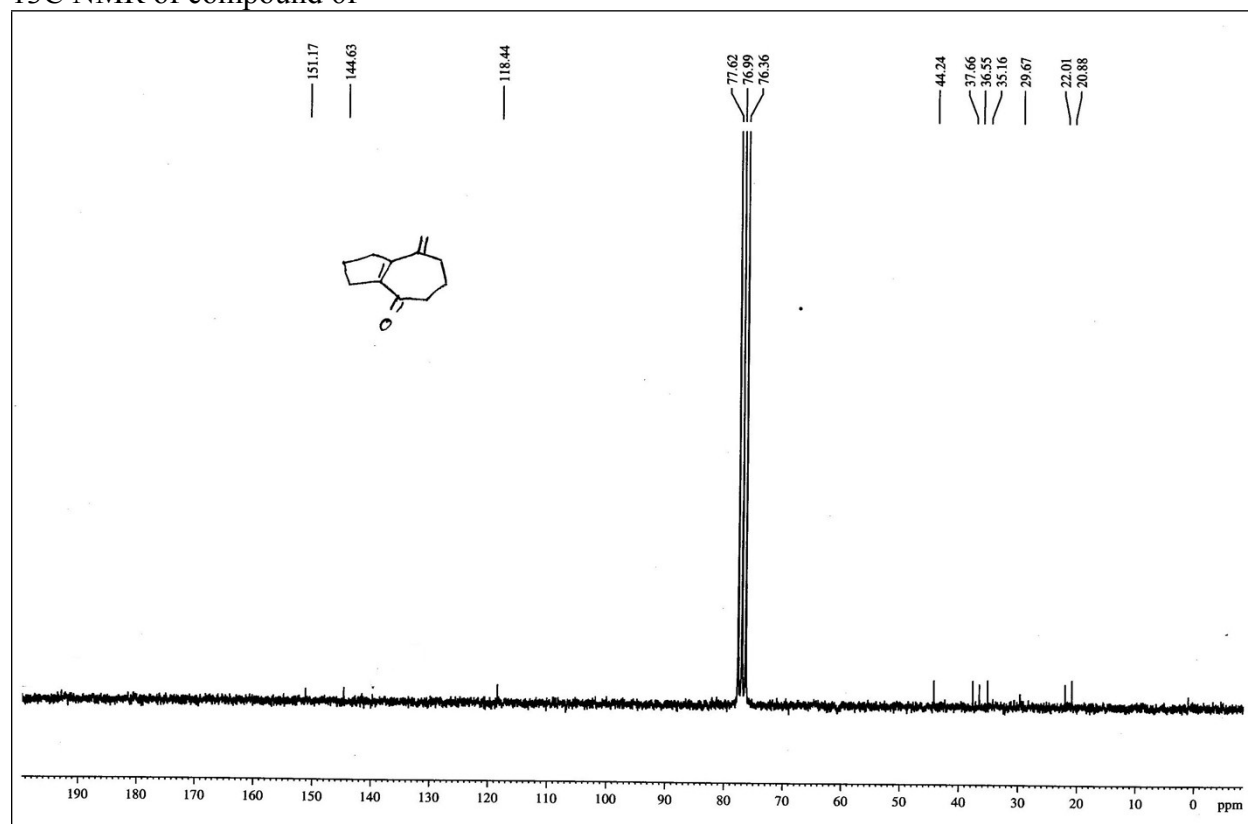



# <sup>1</sup>H NMR of compound 6g

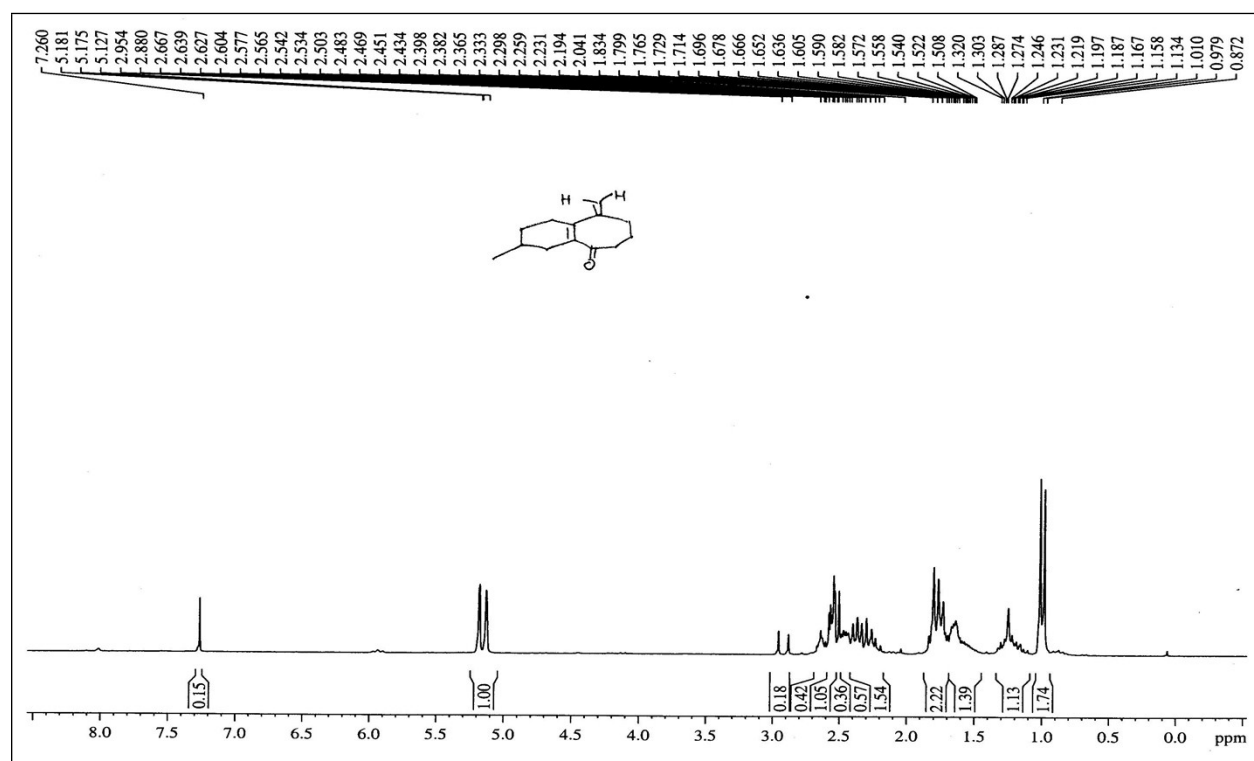

# <sup>13</sup>C NMR of compound 6g

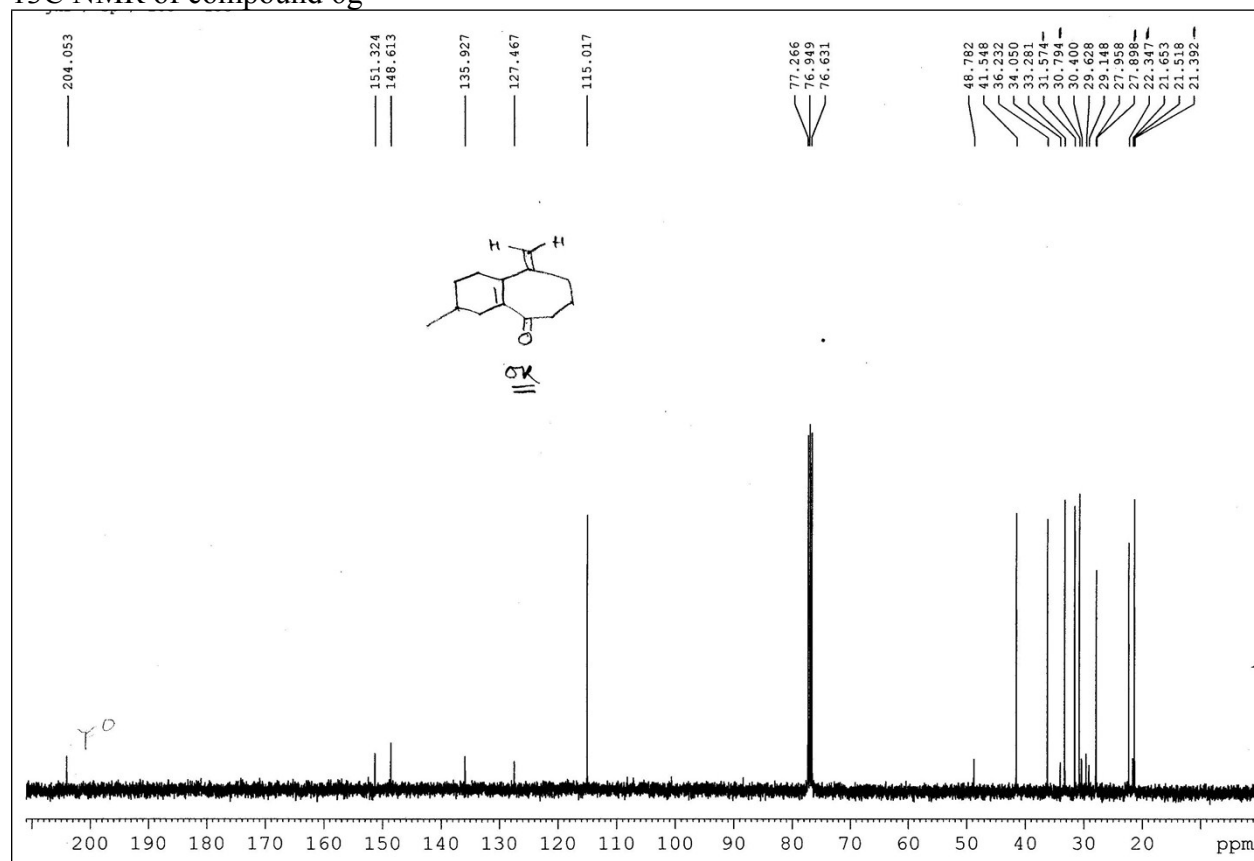

# <sup>1</sup>H NMR of compound 6h

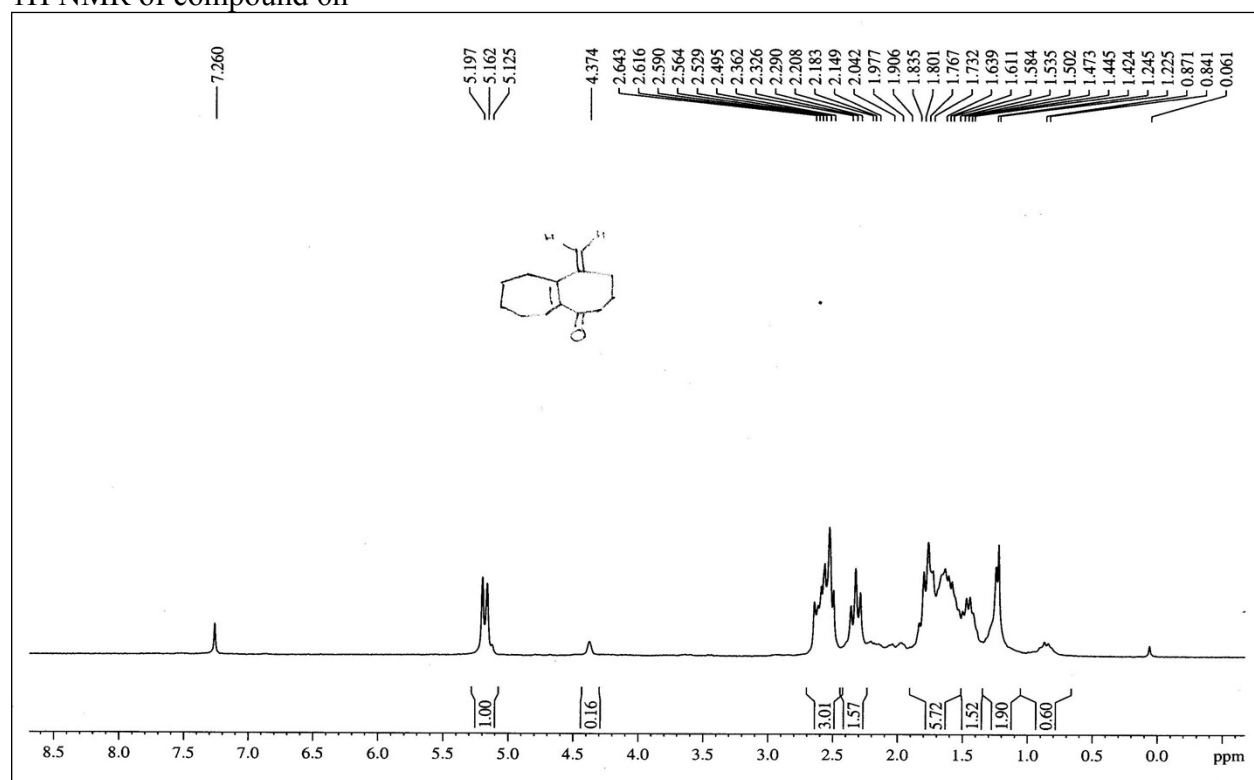

# <sup>13</sup>C NMR of compound 6h

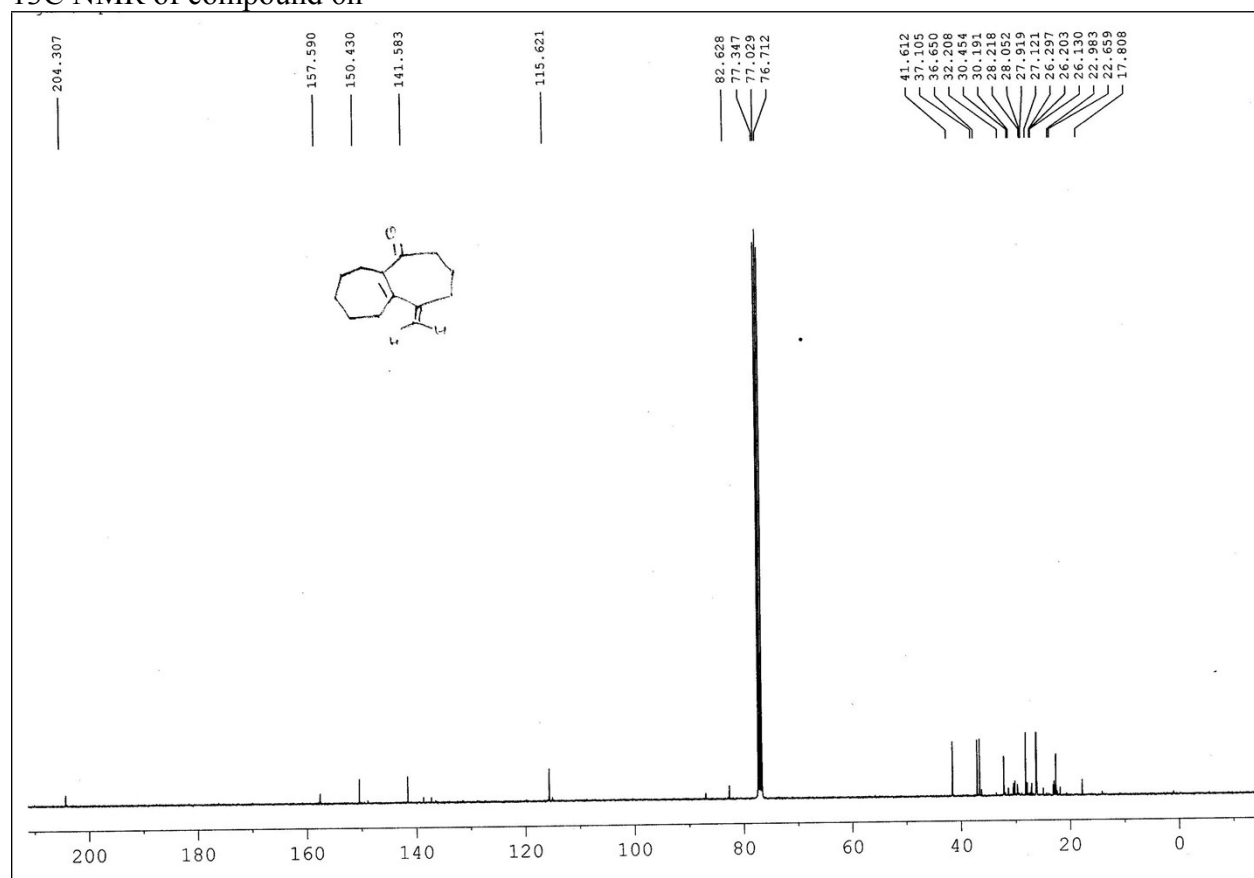

### C. Computational details and analysis

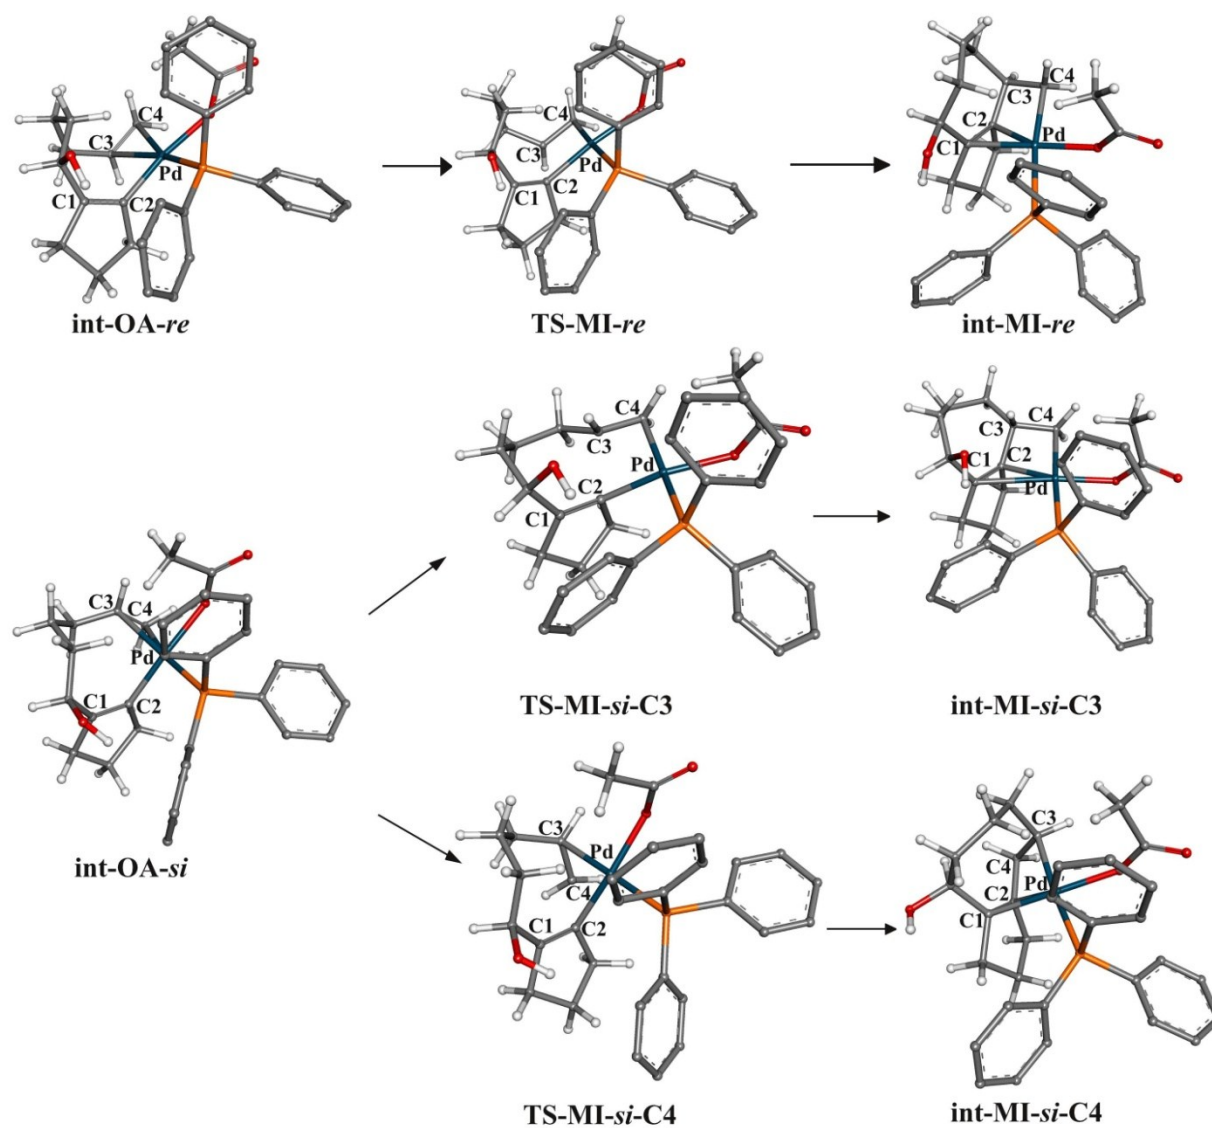

**Figure SII1:** Mechanism of Migratory Insertion catalyzed by  $\text{Pd}(\text{OAc})\text{L}$  with optimized geometries

**Table S1.** The distances between the carbon atoms involved in the cyclization.

|                  | int-OA- <i>re</i>                                |                                                  | int-OA- <i>si</i>                                |                                                  |
|------------------|--------------------------------------------------|--------------------------------------------------|--------------------------------------------------|--------------------------------------------------|
|                  | C <sub>2</sub> -C <sub>3</sub> (d <sub>1</sub> ) | C <sub>2</sub> -C <sub>4</sub> (d <sub>2</sub> ) | C <sub>2</sub> -C <sub>3</sub> (d <sub>1</sub> ) | C <sub>2</sub> -C <sub>4</sub> (d <sub>2</sub> ) |
| Pd(OAc)L         | 2.88                                             | 3.56                                             | 3.10                                             | 3.03                                             |
| Pd(Cl)L          | 2.74                                             | 3.50                                             | 3.13                                             | 3.02                                             |
| PdL <sub>2</sub> | 2.79                                             | 3.45                                             | 2.96                                             | 2.78                                             |
| PdL              | 2.54                                             | 3.39                                             | 3.06                                             | 2.92                                             |

|                  | TS (to <i>exo</i> )                              |                                                  |                                                  |                                                  | TS (to <i>endo</i> )                             |                                                  |                                                  |                                                  |
|------------------|--------------------------------------------------|--------------------------------------------------|--------------------------------------------------|--------------------------------------------------|--------------------------------------------------|--------------------------------------------------|--------------------------------------------------|--------------------------------------------------|
|                  | <i>re</i>                                        |                                                  | <i>si</i>                                        |                                                  | <i>re</i>                                        |                                                  | <i>si</i>                                        |                                                  |
|                  | C <sub>2</sub> -C <sub>3</sub> (d <sub>1</sub> ) | C <sub>2</sub> -C <sub>4</sub> (d <sub>2</sub> ) | C <sub>2</sub> -C <sub>3</sub> (d <sub>1</sub> ) | C <sub>2</sub> -C <sub>4</sub> (d <sub>2</sub> ) | C <sub>2</sub> -C <sub>3</sub> (d <sub>1</sub> ) | C <sub>2</sub> -C <sub>4</sub> (d <sub>2</sub> ) | C <sub>2</sub> -C <sub>3</sub> (d <sub>1</sub> ) | C <sub>2</sub> -C <sub>4</sub> (d <sub>2</sub> ) |
| Pd(OAc)L         | 1.94                                             | 2.83                                             | 2.01                                             | 2.77                                             | Not possible                                     | Not possible                                     | 2.69                                             | 1.84                                             |
| Pd(Cl)L          | 1.95                                             | 2.85                                             | 2.00                                             | 2.75                                             | Not possible                                     | Not possible                                     | 2.76                                             | 1.93                                             |
| PdL <sub>2</sub> | 2.20                                             | 2.94                                             | 2.08                                             | 2.63                                             | Not possible                                     | Not possible                                     | 2.69                                             | 1.92                                             |
| PdL              | 2.16                                             | 3.04                                             | 2.10                                             | 2.73                                             | Not possible                                     | Not possible                                     | 2.75                                             | 1.99                                             |

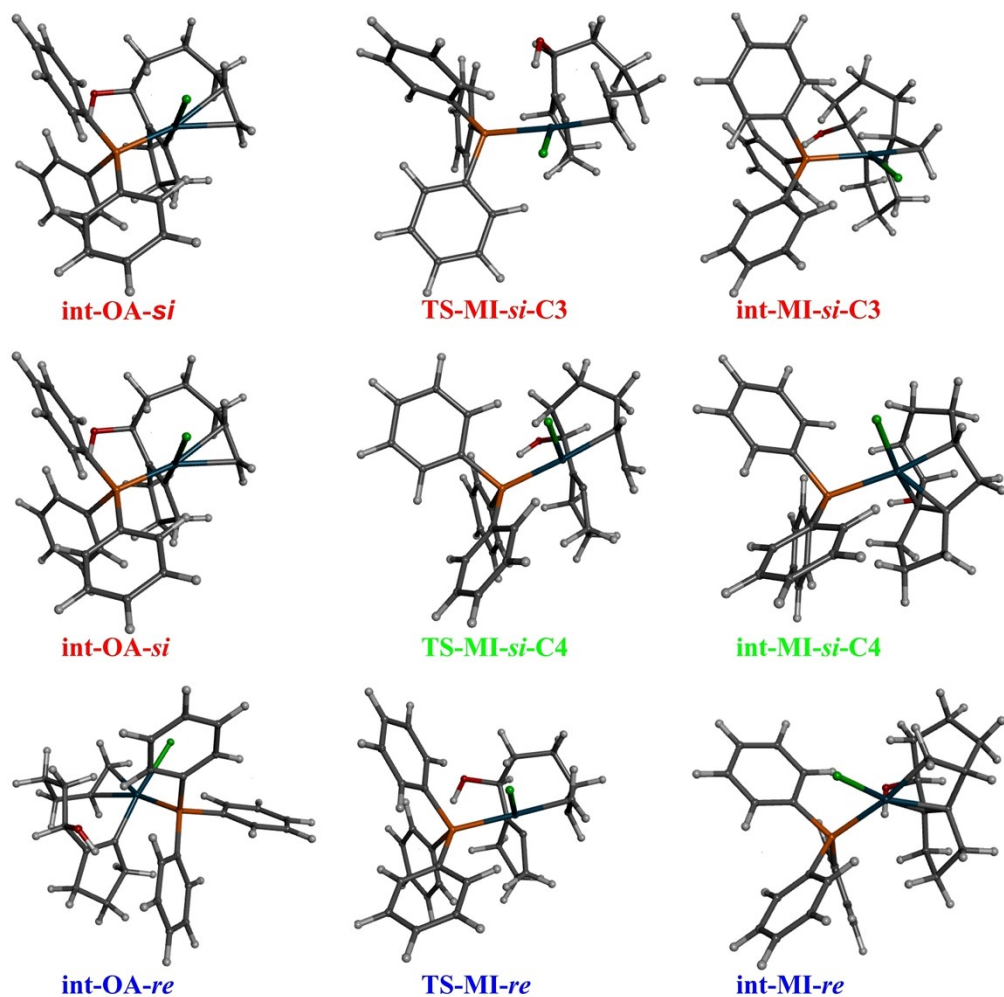

**Figure SI2:** Optimized geometries of *si* face 7-*exo* and 8-*endo* along with *re* face 7-*exo* migratory insertion by [Cl-Pd-PPh<sub>3</sub>] catalyst

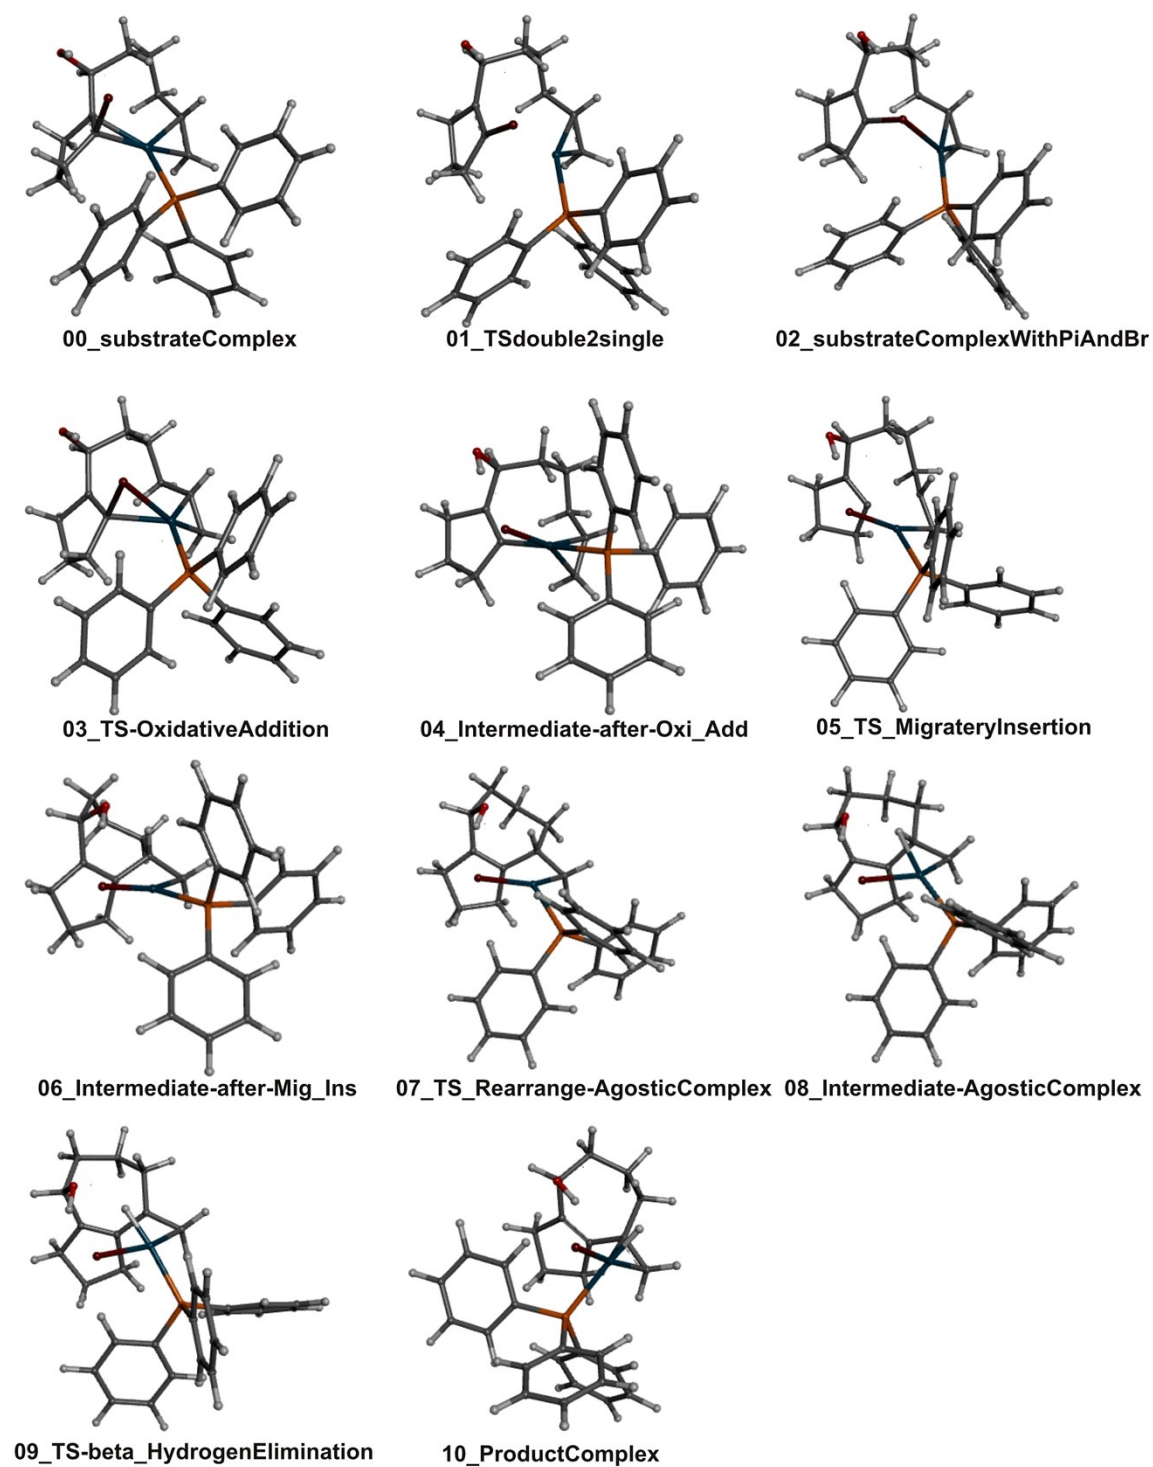

**Figure SI3:** Optimized geometries of *si* face 7-exo migratory insertion by Pd(PPh<sub>3</sub>) catalyst

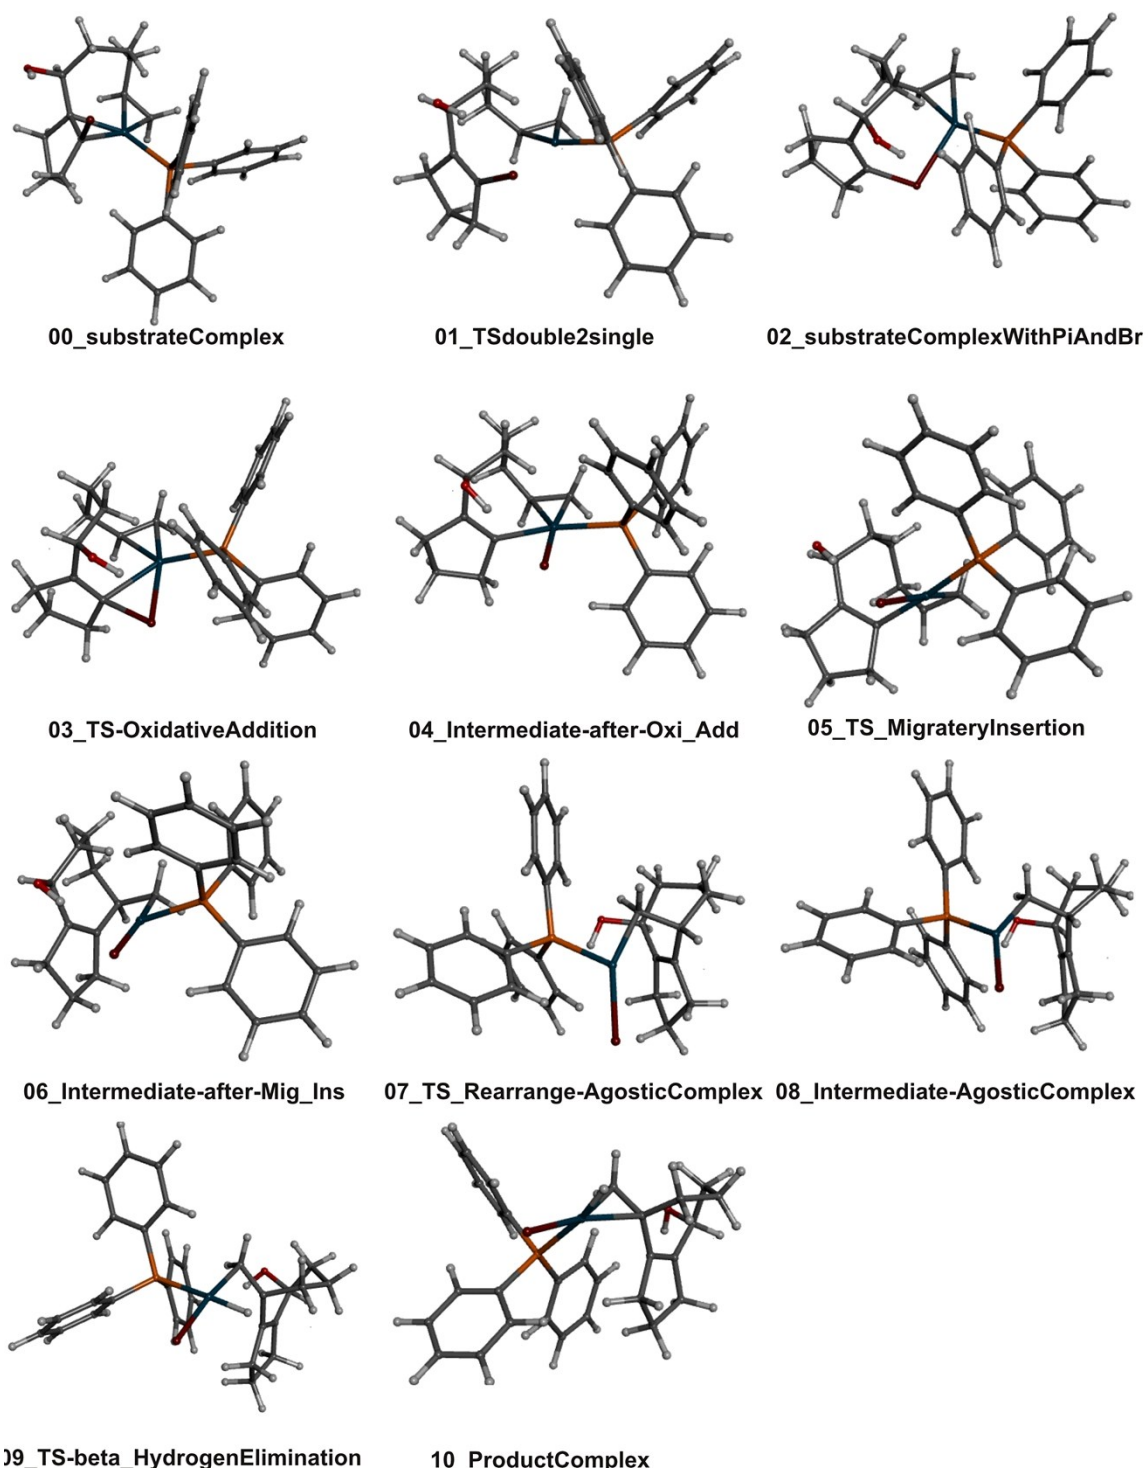

**Figure SI4:** Optimized geometries of *re* face 7-*exo* migratory insertion by Pd(PPh<sub>3</sub>) catalyst

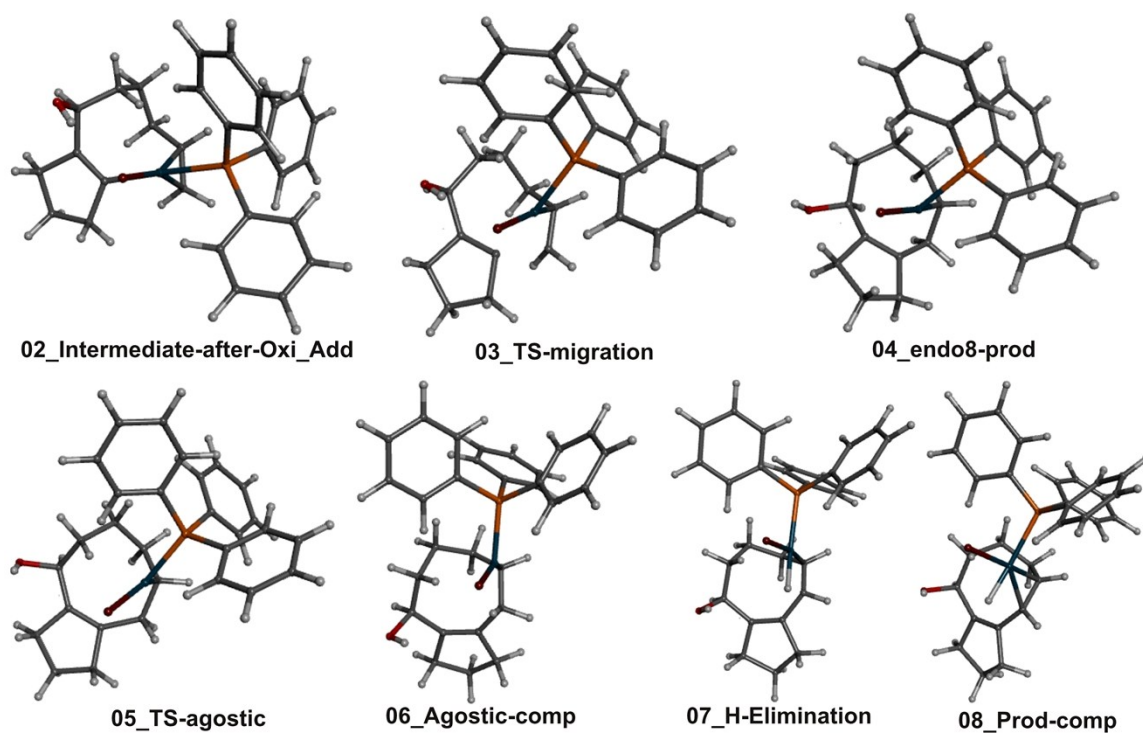

**Figure S15:** Optimized geometries of *si* face 8-*endo* migratory insertion by Pd(PPh<sub>3</sub>) catalyst



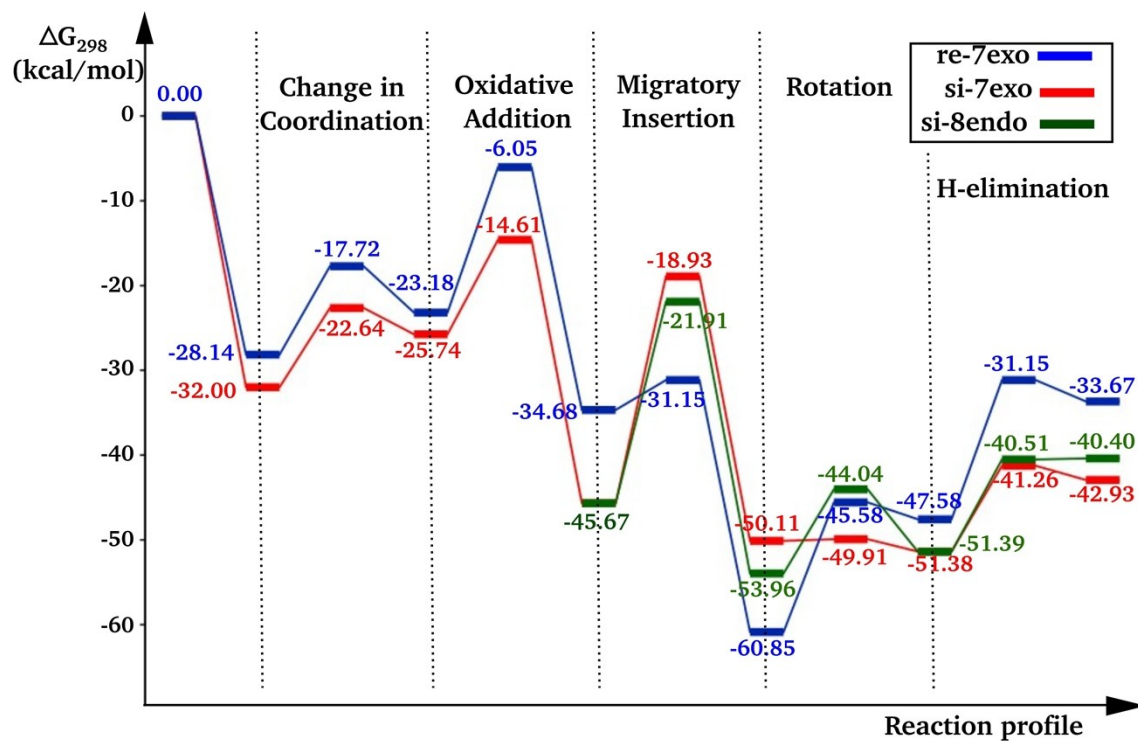

**Figure SI6:** Potential energy diagram of intramolecular Heck reaction by Pd(PPh<sub>3</sub>) catalyst [Substrate+Pd(PPh<sub>3</sub>) is reference 0.00 kcal/mol]
